# Supplementary material for: A RASSF1A-HIF1α loop drives Warburg effect in cancer and pulmonary hypertension
Source: PubMed Central journal article supplement (PMC6513860; doi:10.1038/s41467-019-10044-z), 2019-05-13

Fig 1e

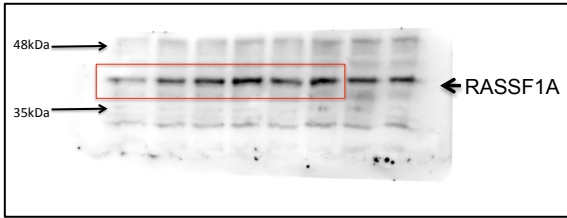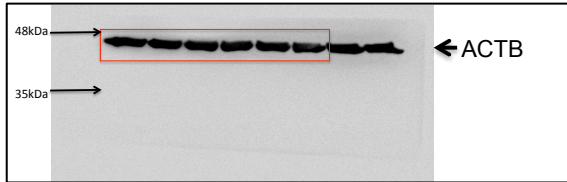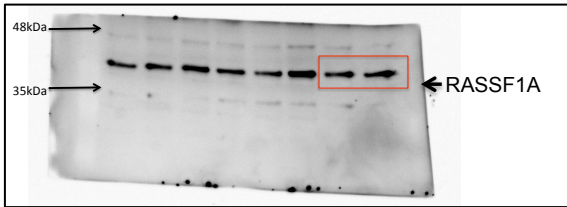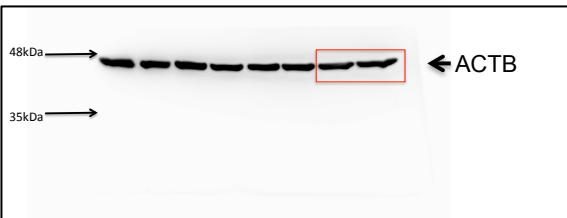

Fig 1e-g

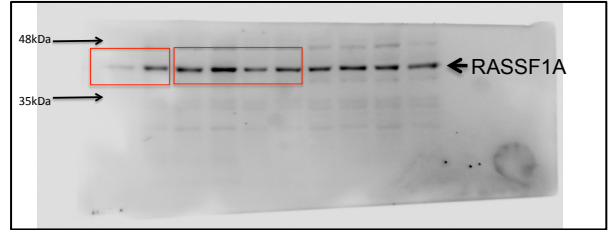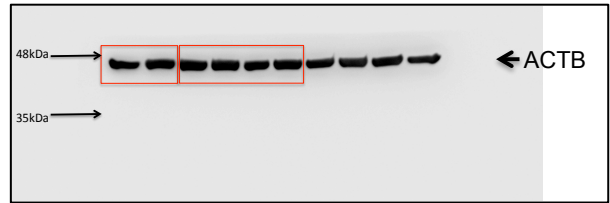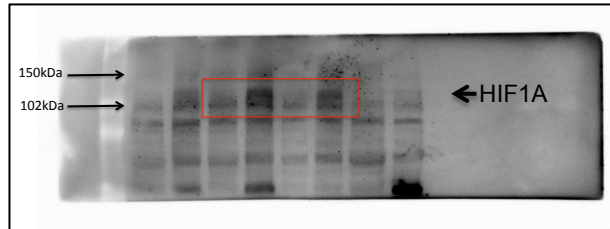

Fig 2a

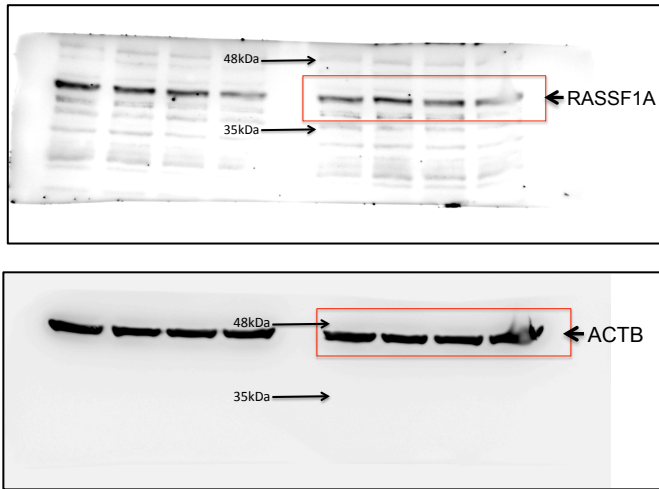

Fig 2d

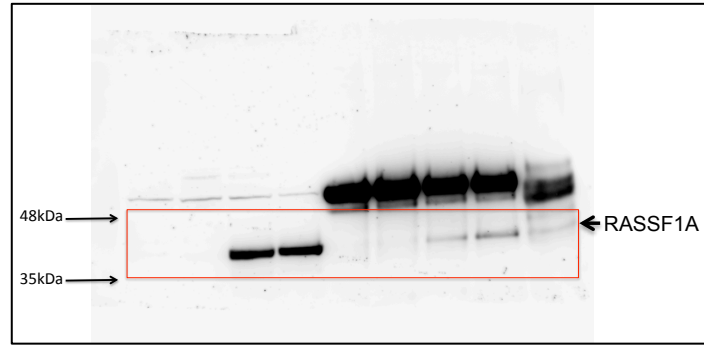

Fig 2b

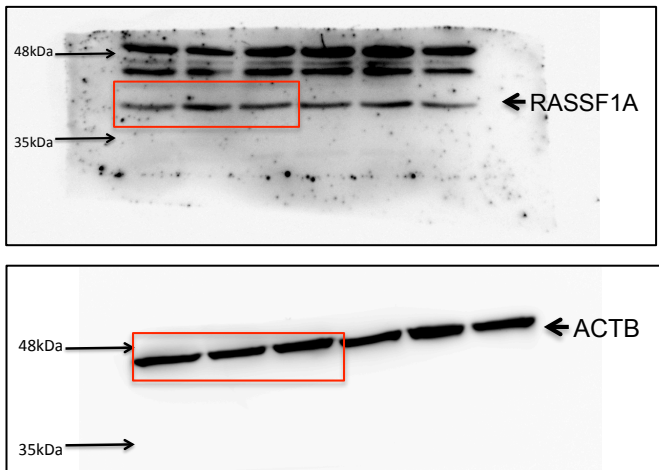

Fig 2e

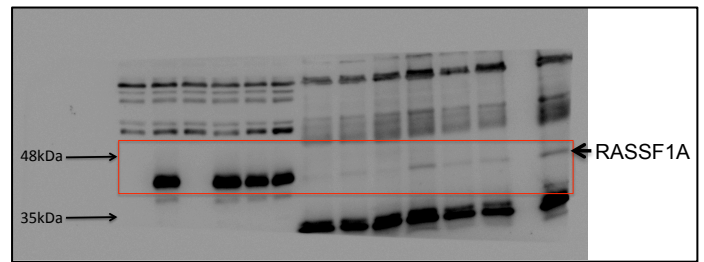

Fig 2c

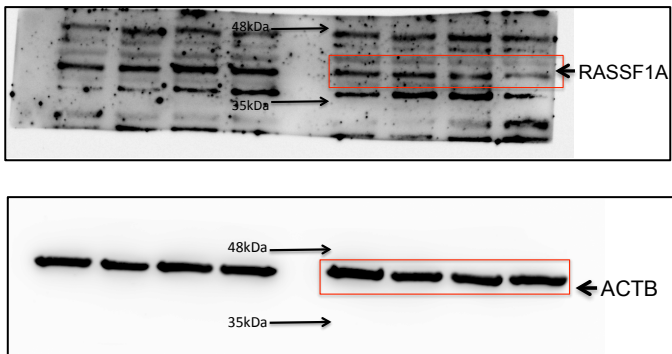

Fig 2f

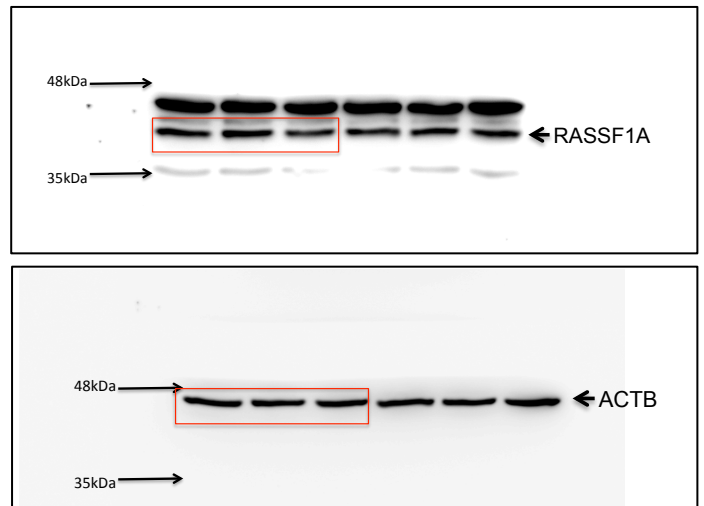



Fig 2g

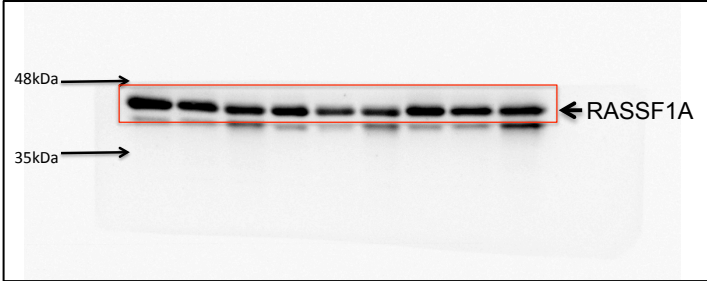

Fig 2i

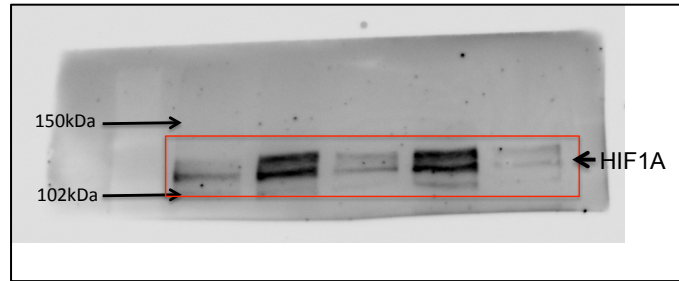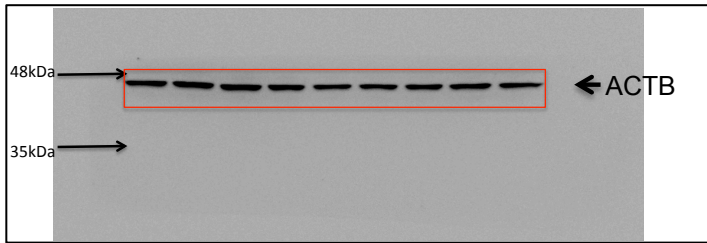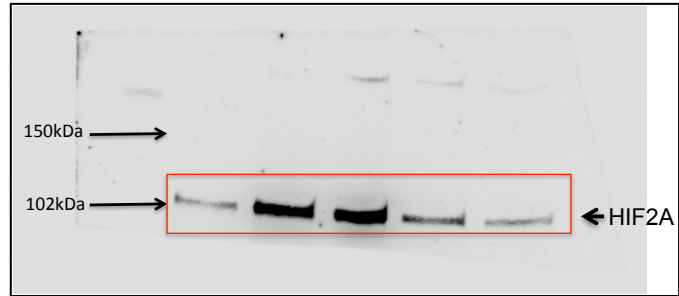

Fig 2h

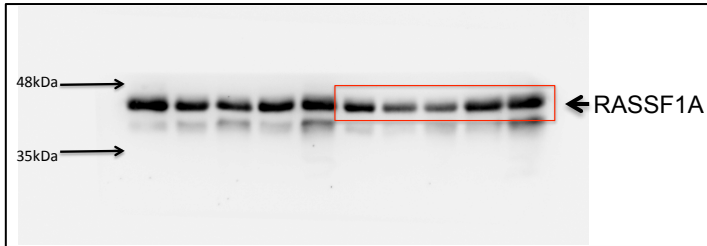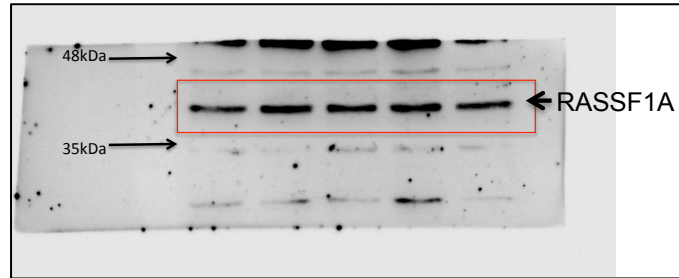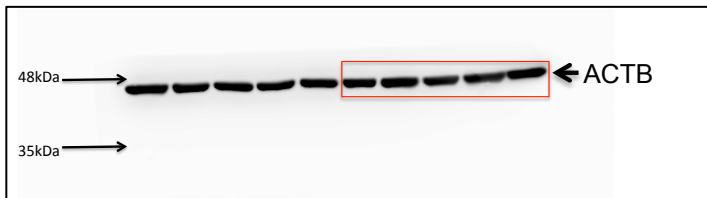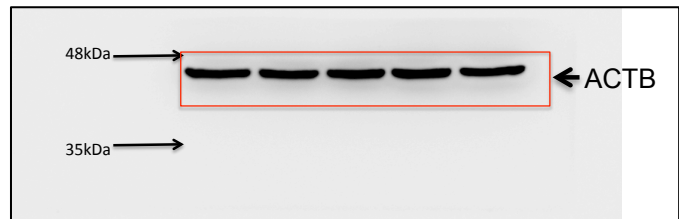

Fig 3e

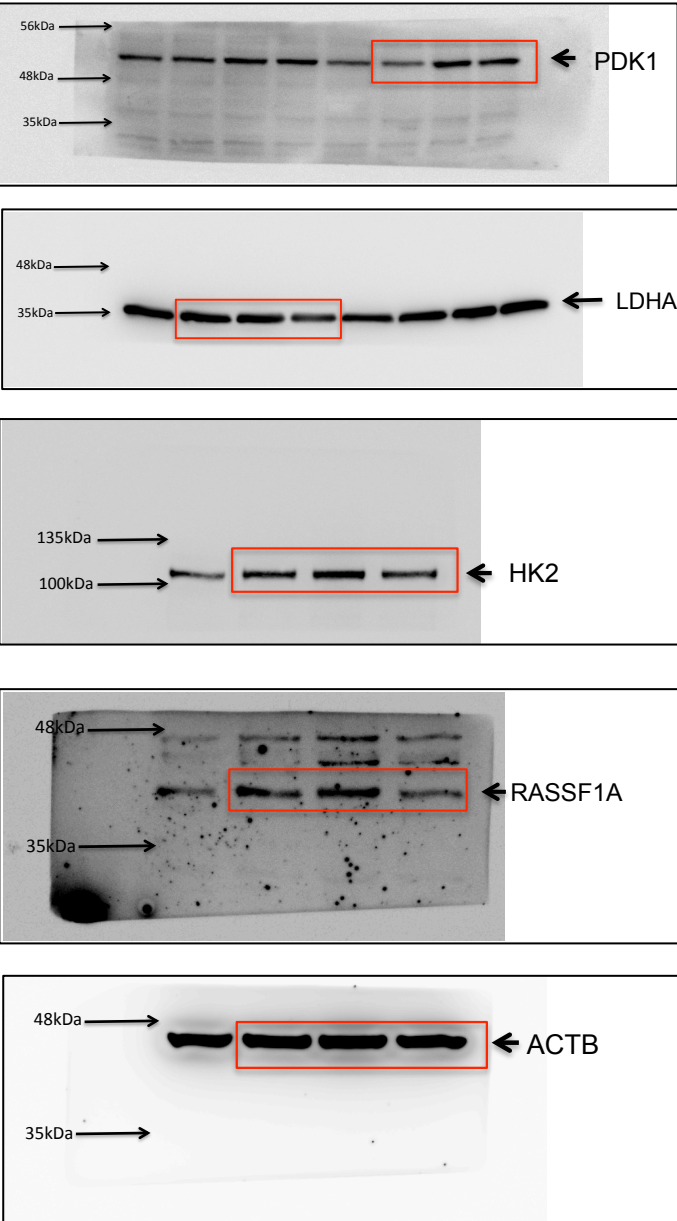

Fig 3g

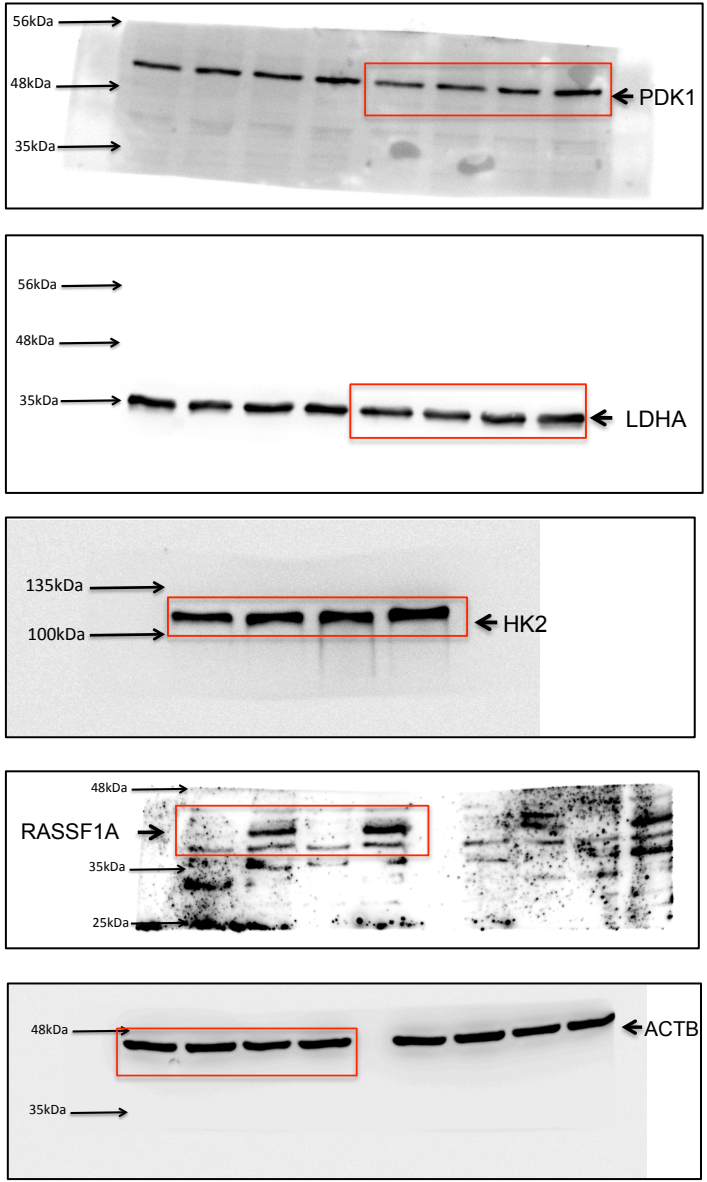

Fig 4a

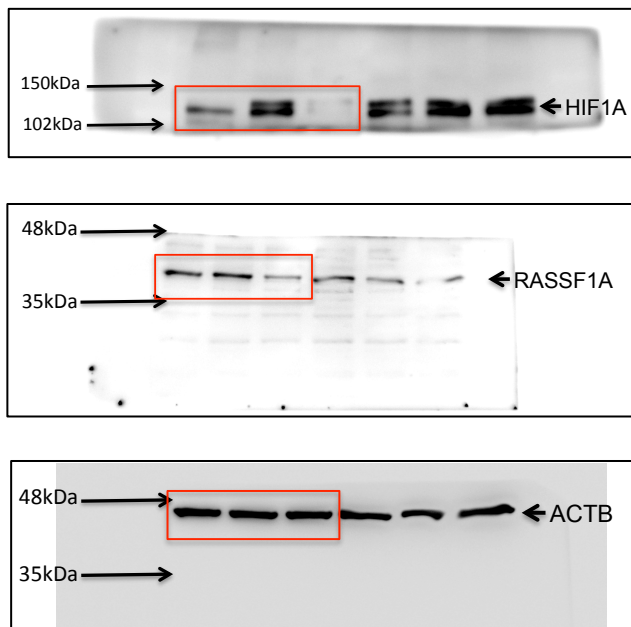

Fig 4e

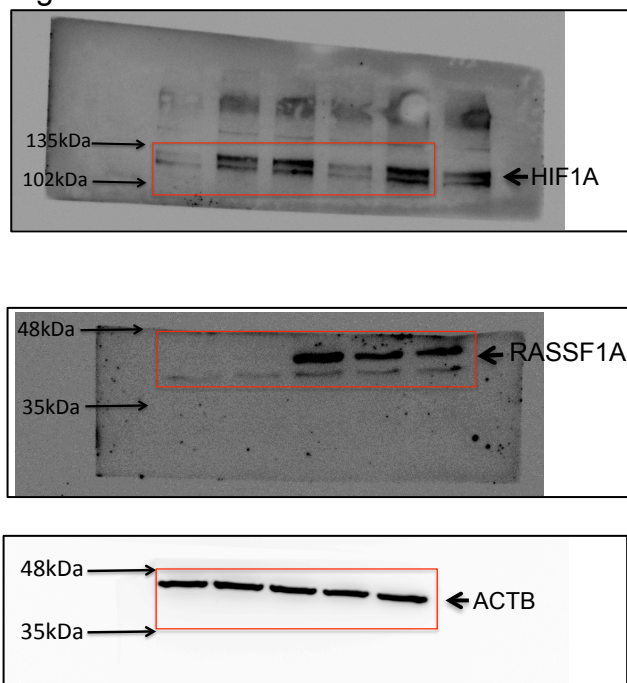

Fig 4b

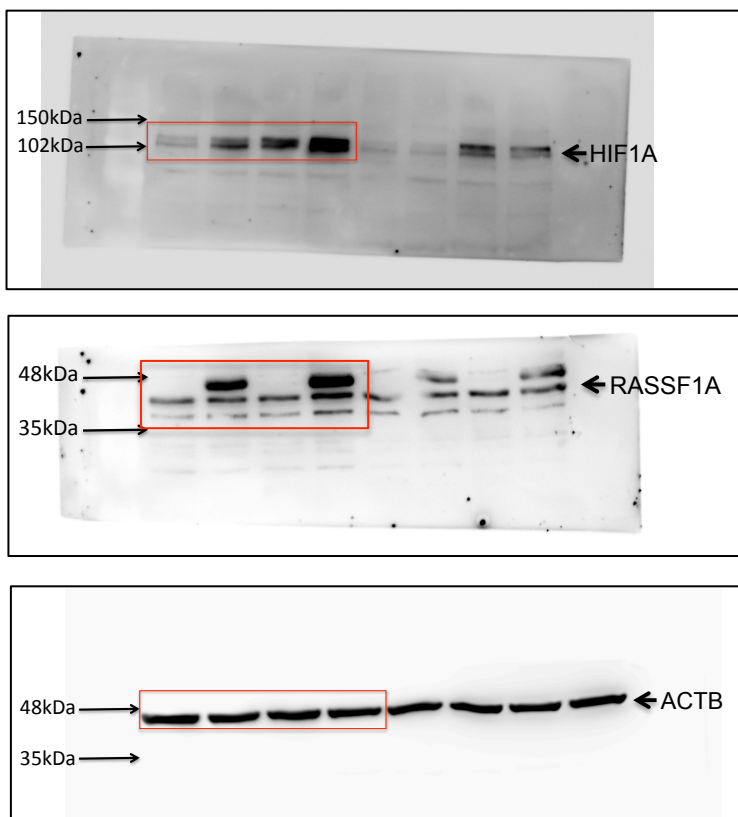

Fig 5a

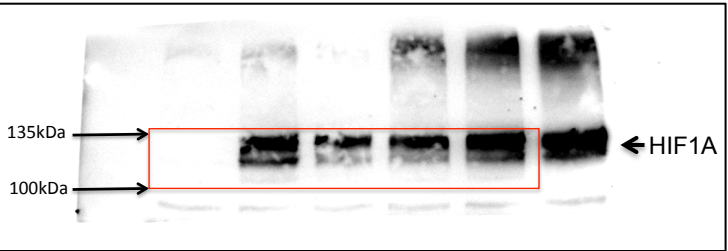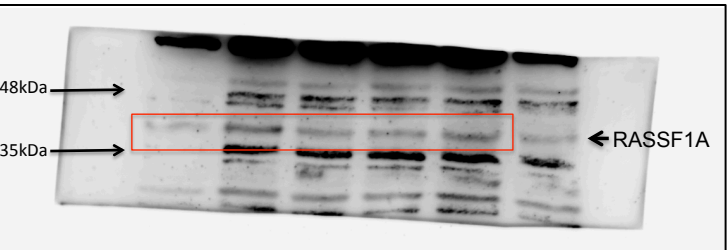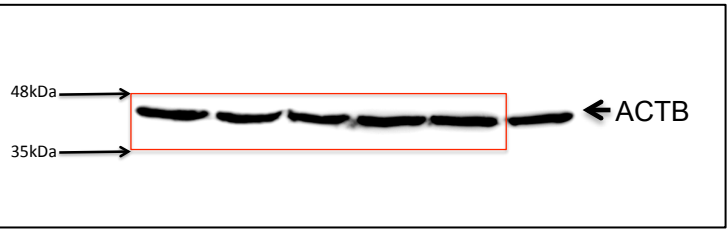

Fig 5b

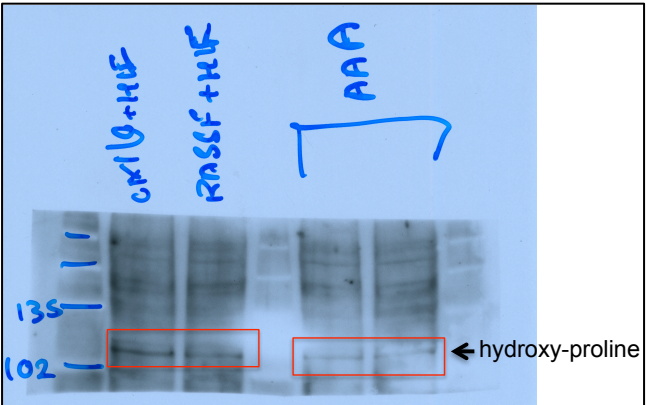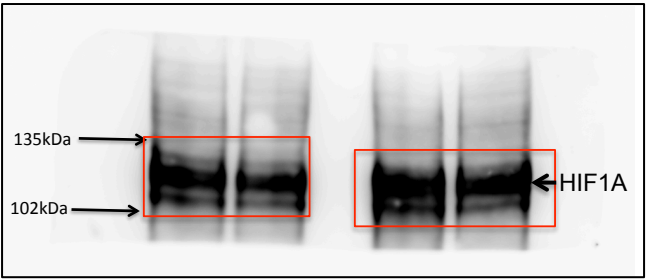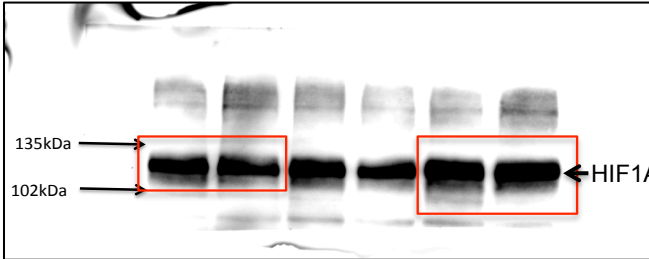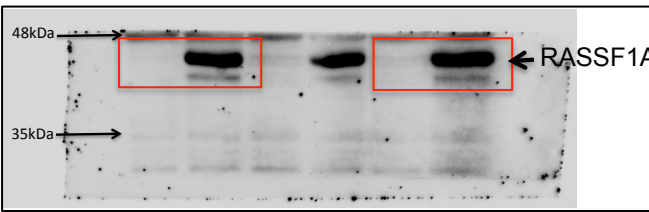

Fig 5c

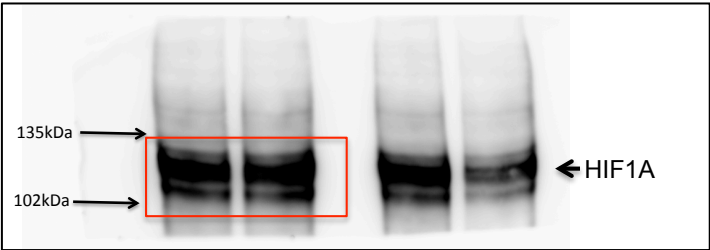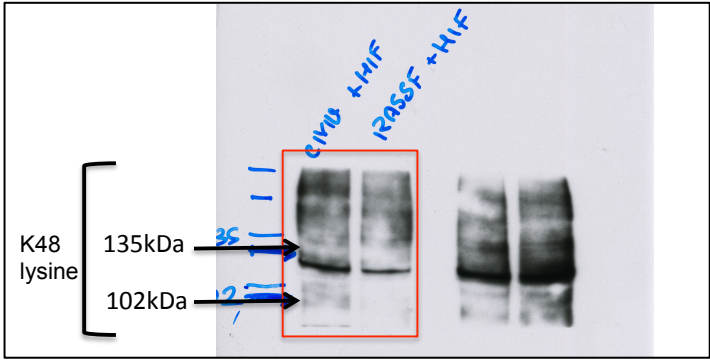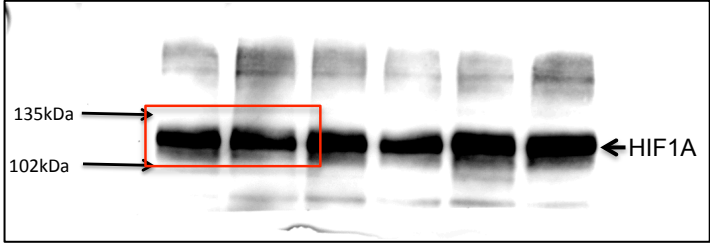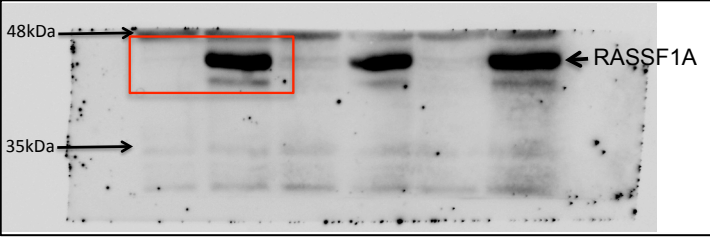

Fig 5d

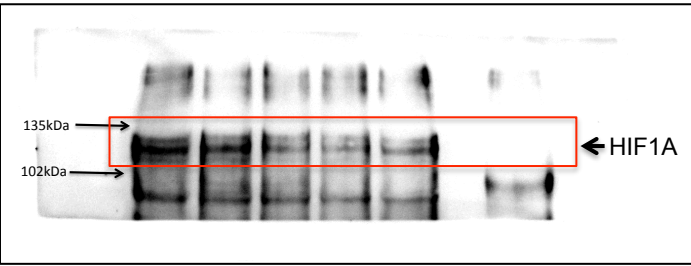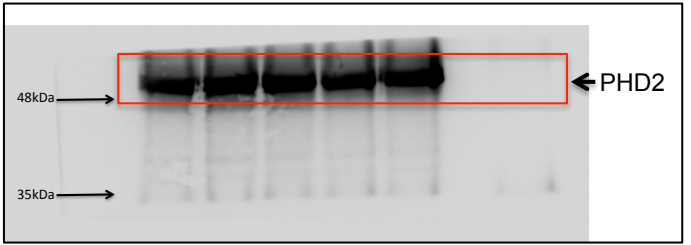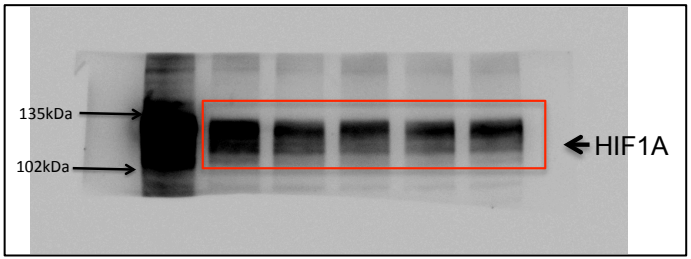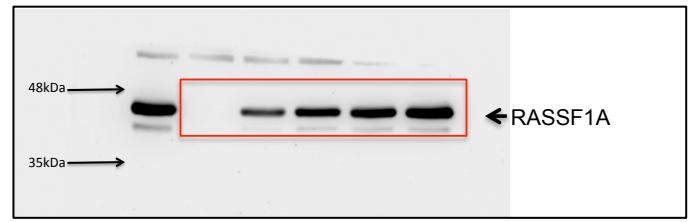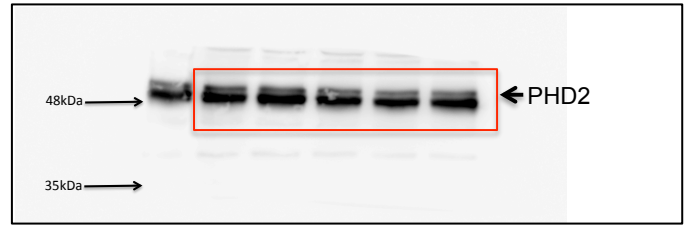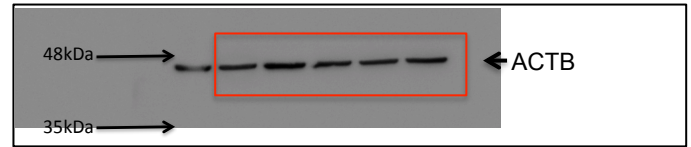



Fig 5e

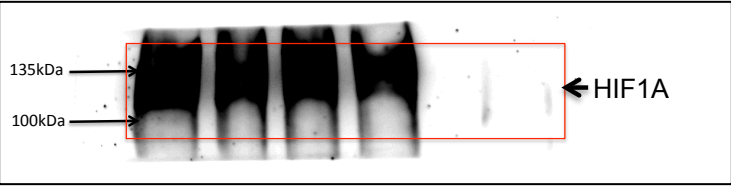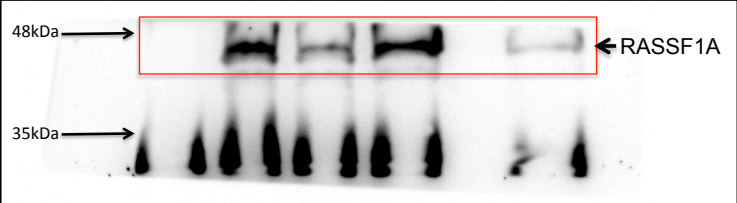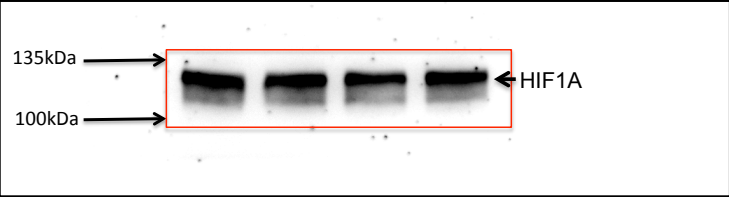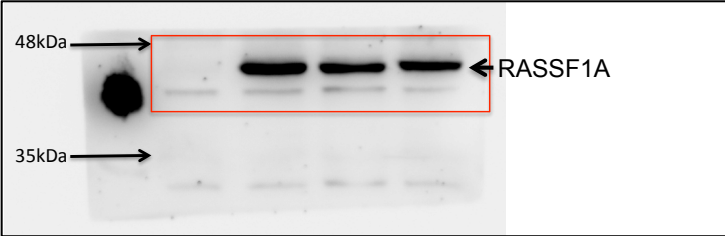

Fig 5f

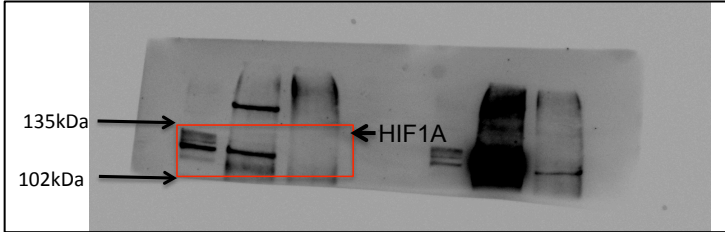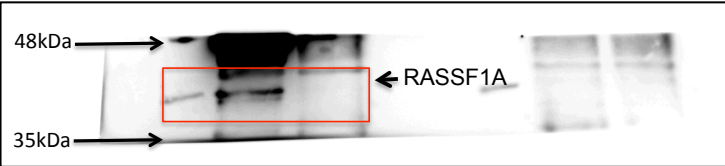

Fig 6e

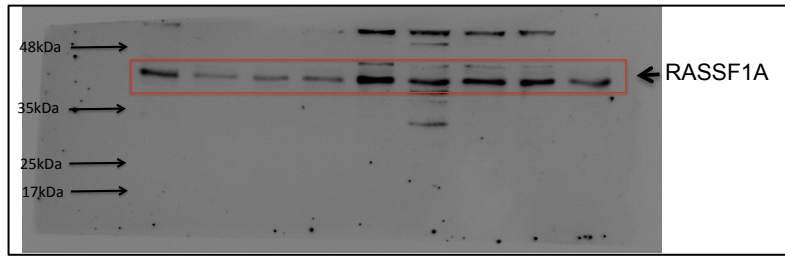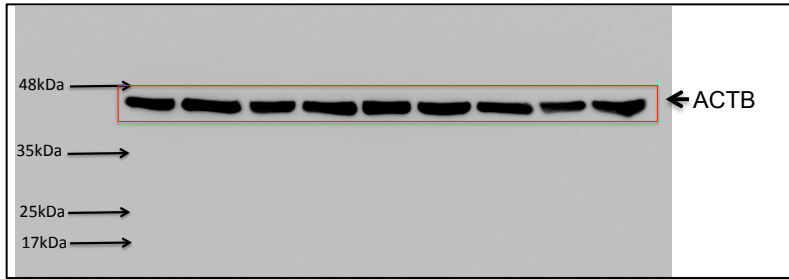

Fig 6h

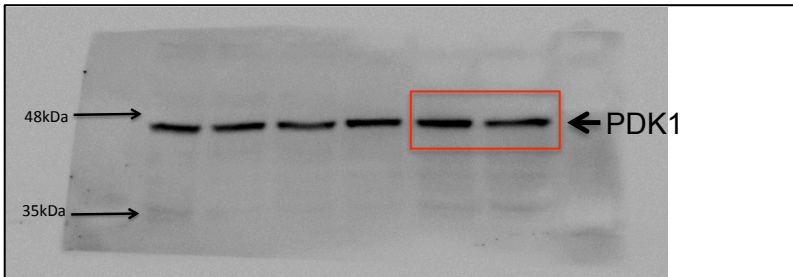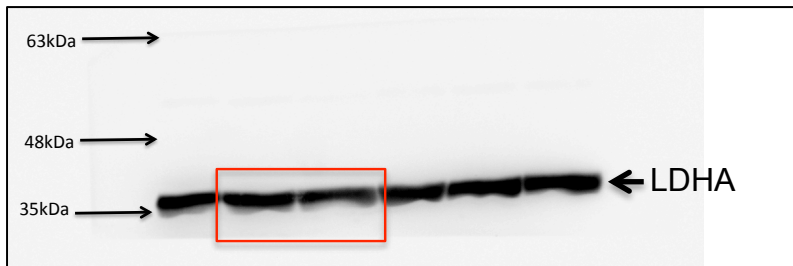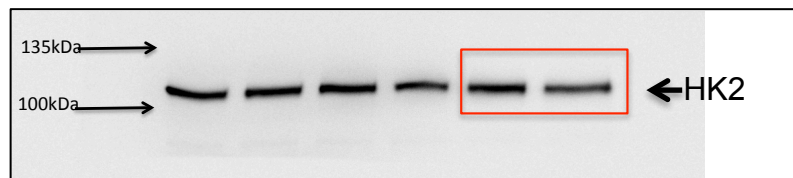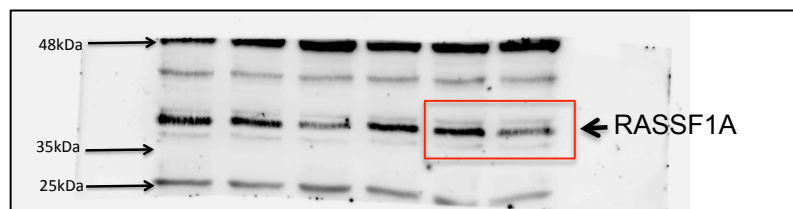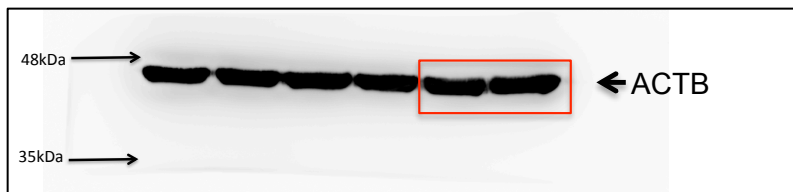



Fig 8a

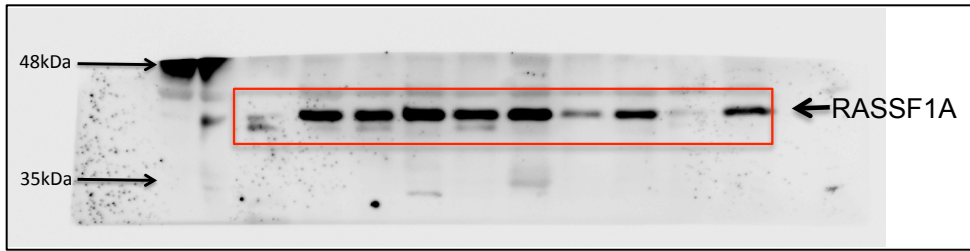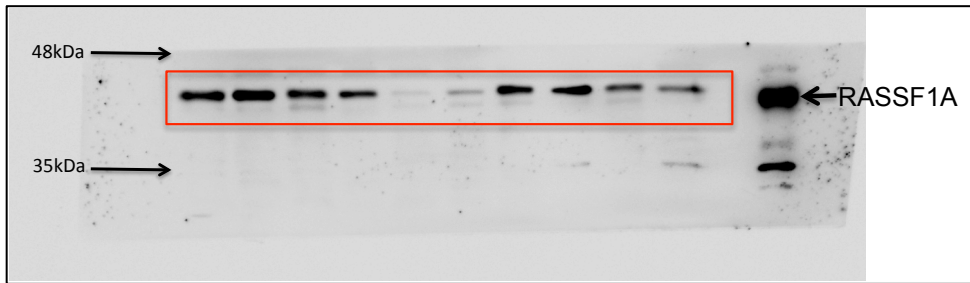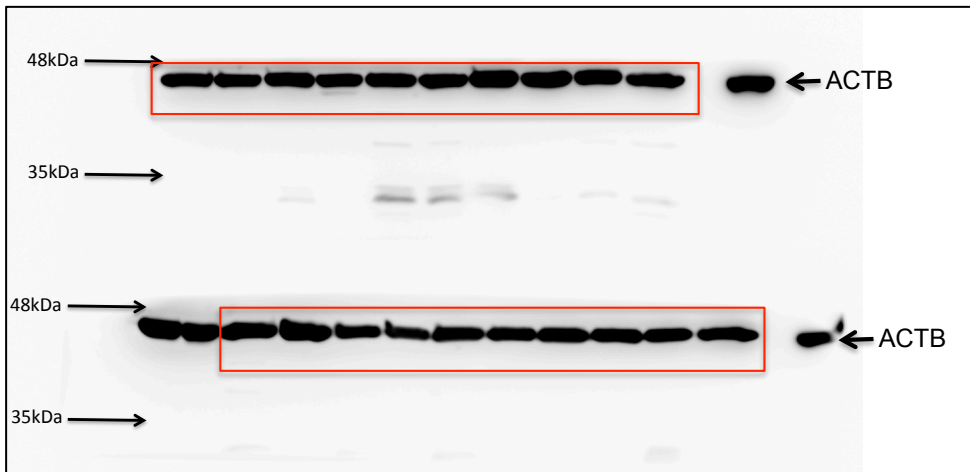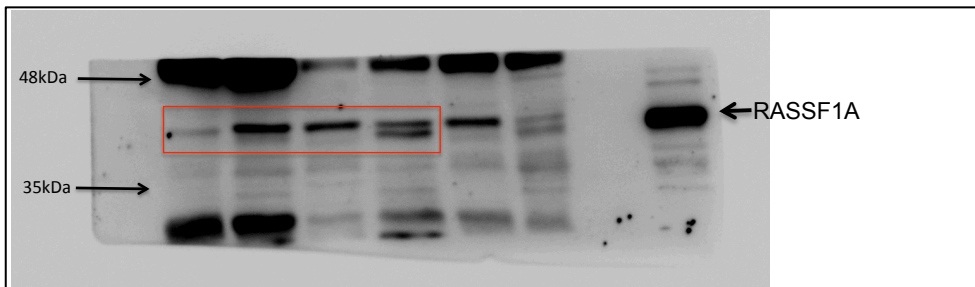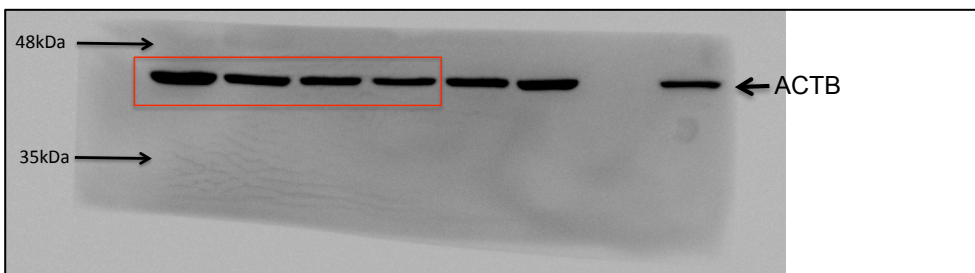

Fig 8

Fig 8c

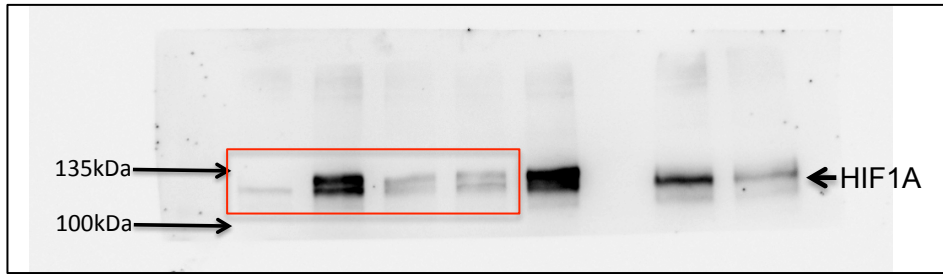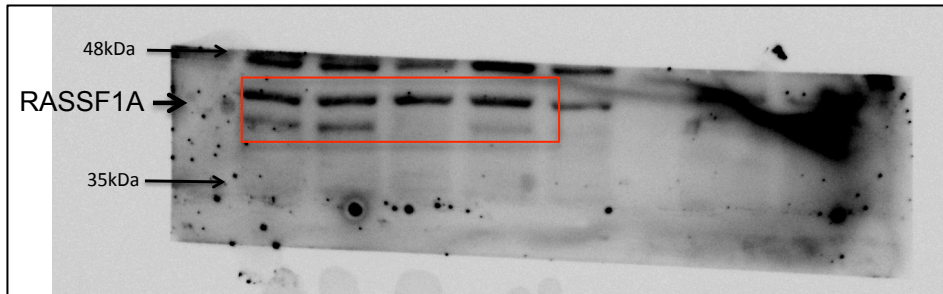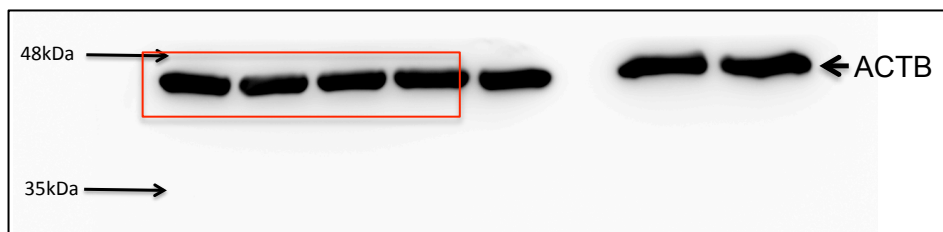

Fig 8e

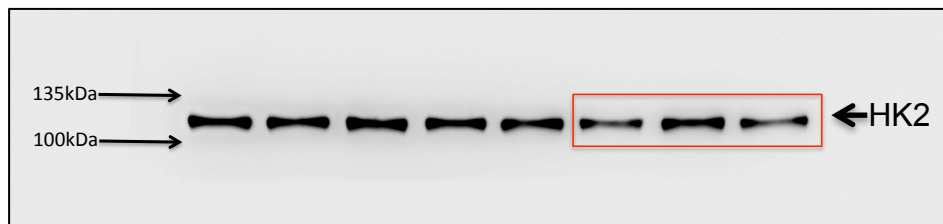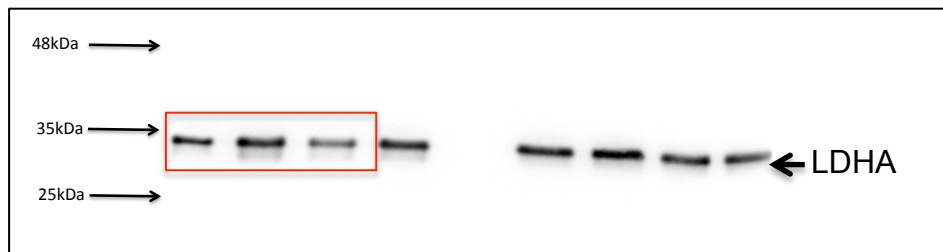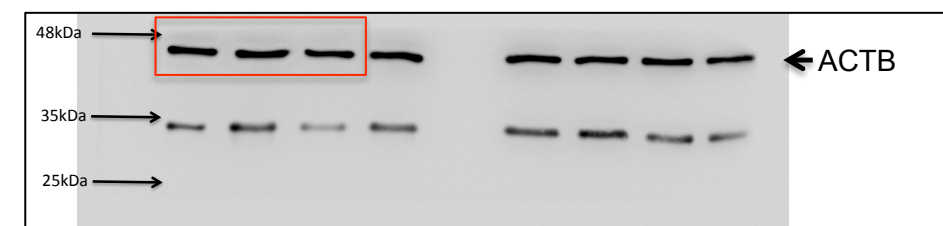

Fig 8g

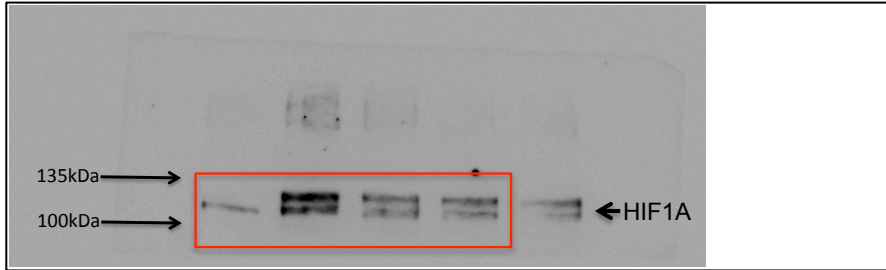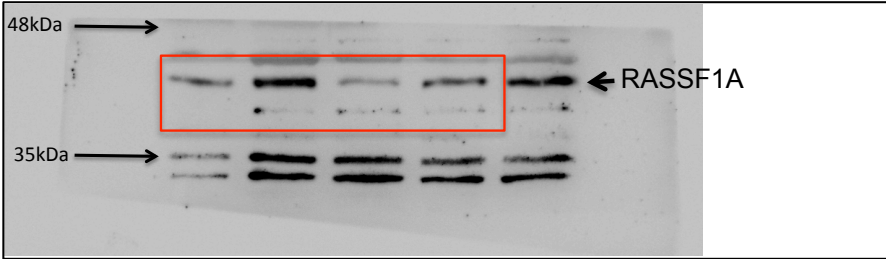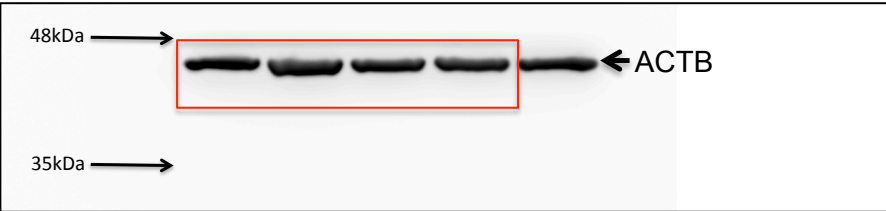

Fig 8i

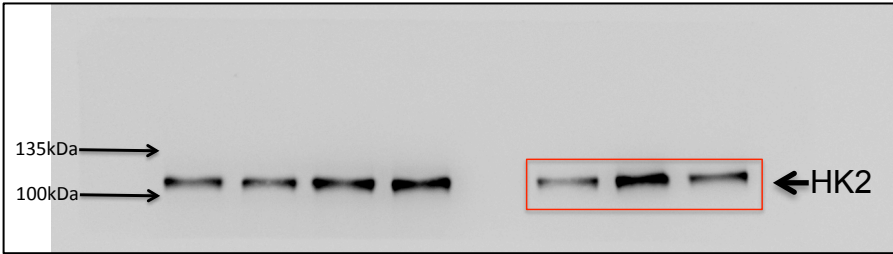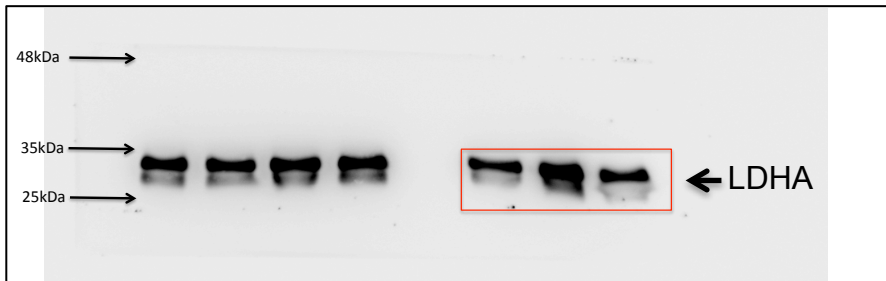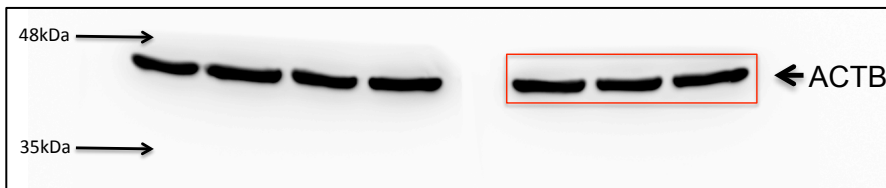

Supplementary Fig 1b

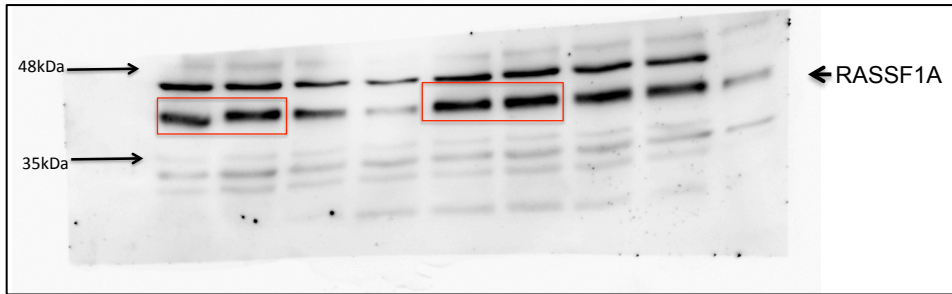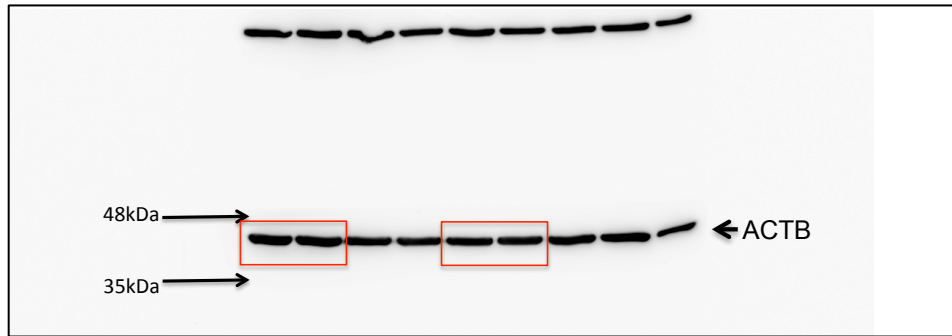

Supplementary Fig 1d

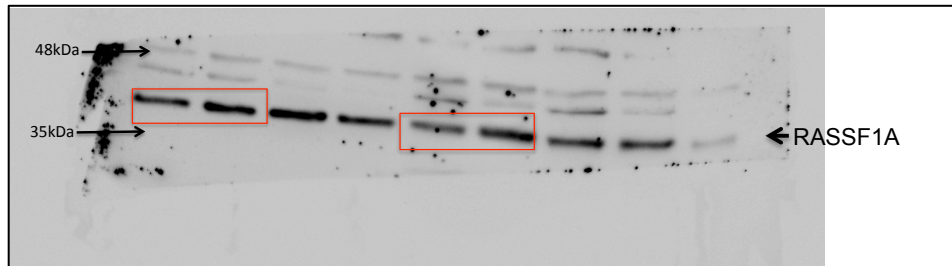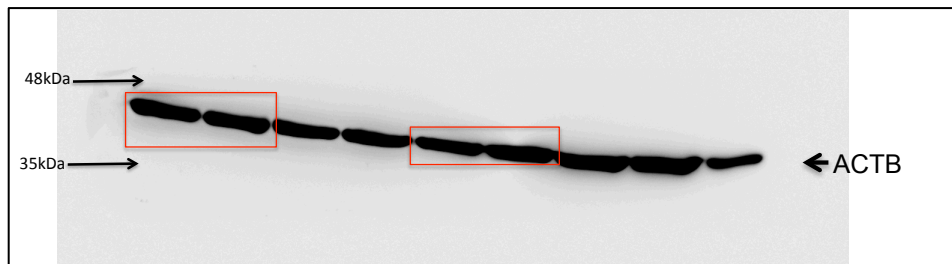

Supplementary Fig 2a

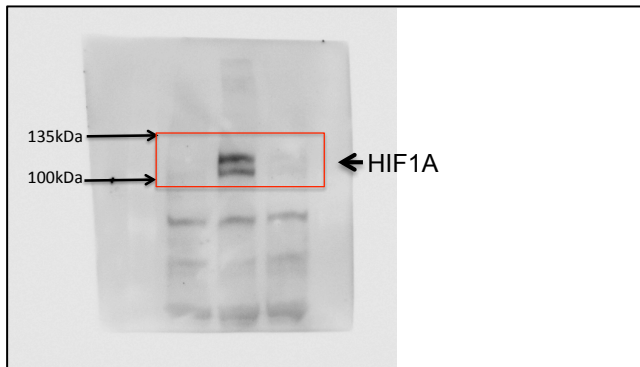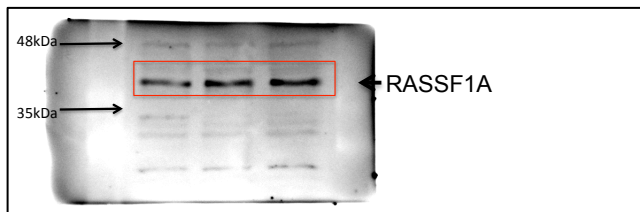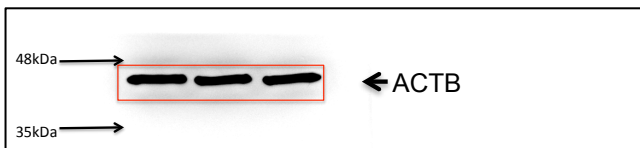

Supplementary Fig 2b

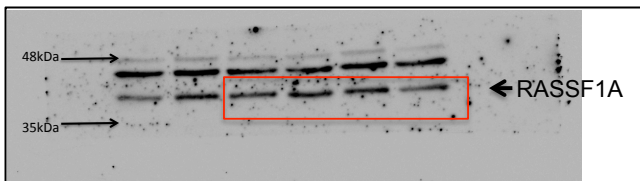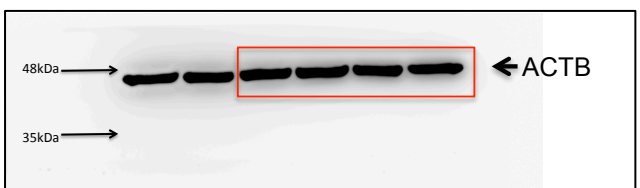

Supplementary Fig 2c

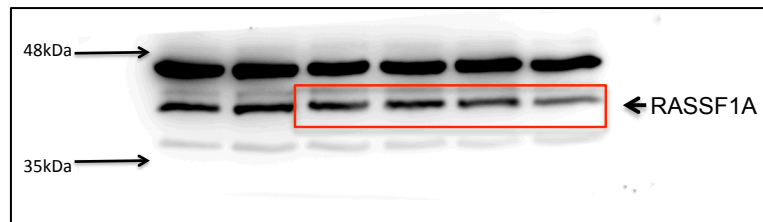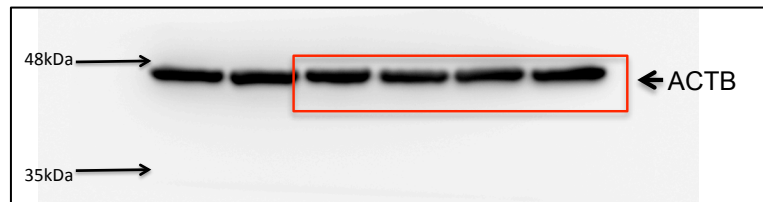

Supplementary Fig 2e

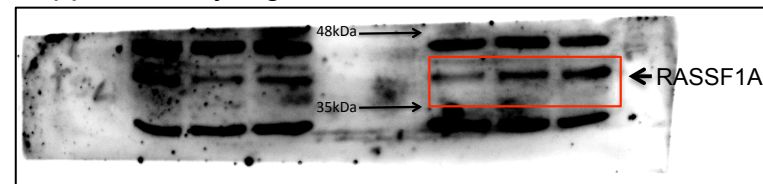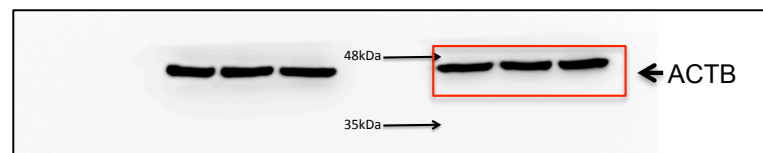

Supplementary Fig 2f

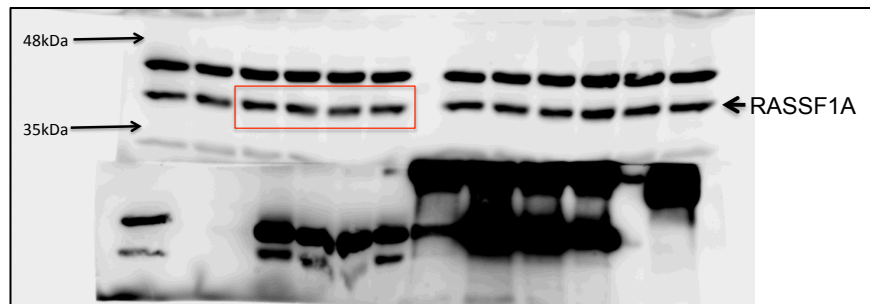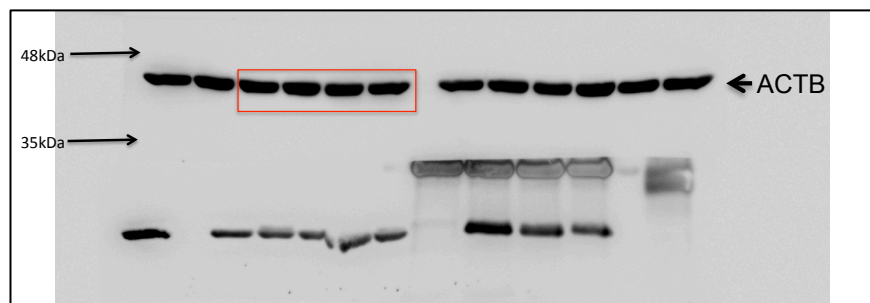

Supplementary Fig 2g

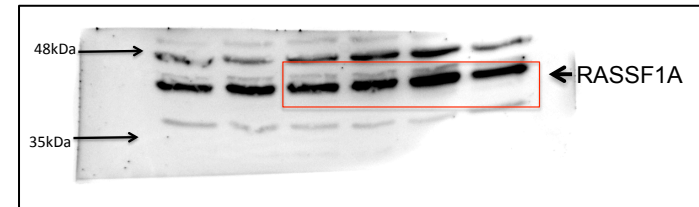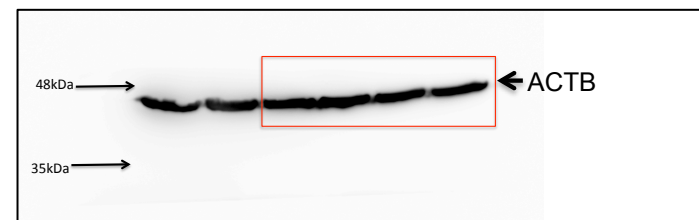

Supplementary Fig 2h

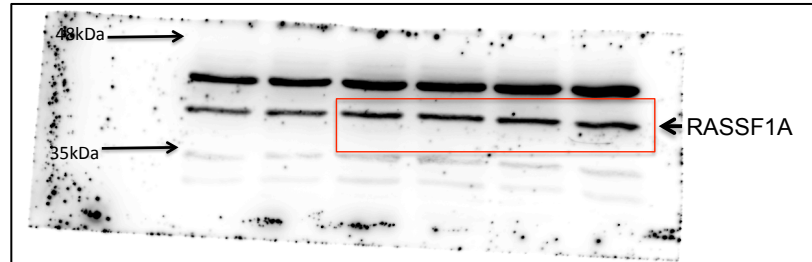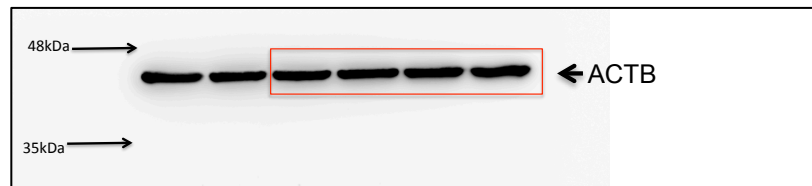

Supplementary Fig 2i

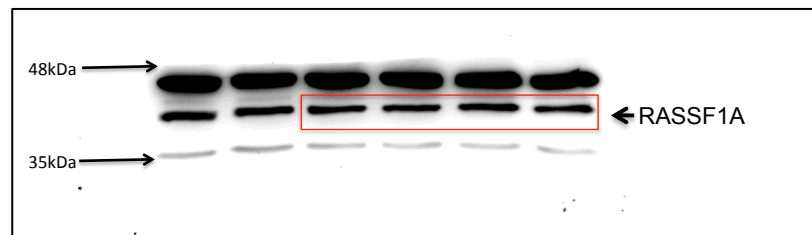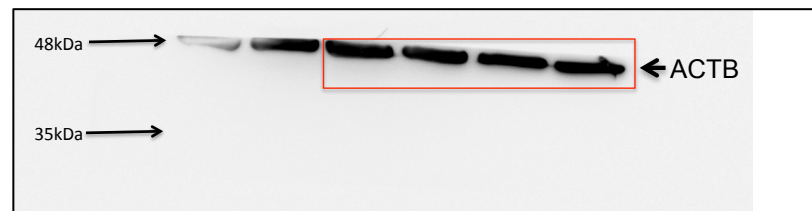



Supplementary Fig 2j

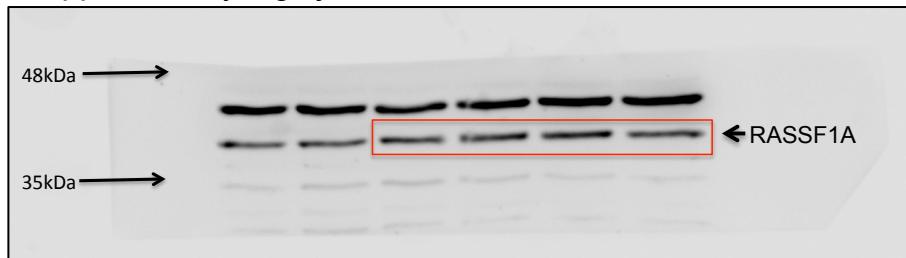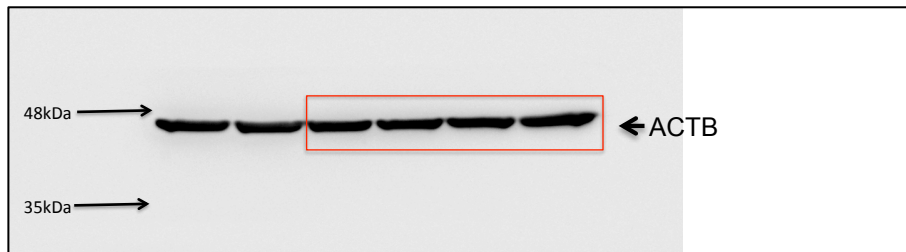

Supplementary Fig 3c

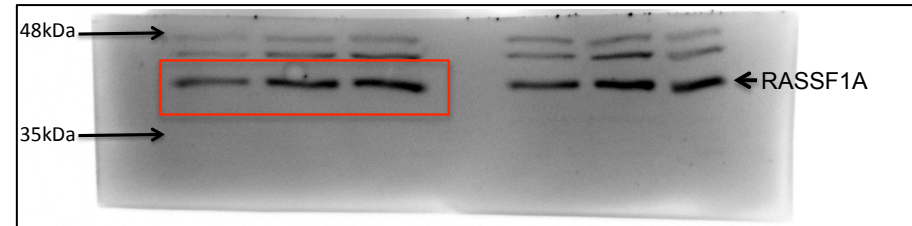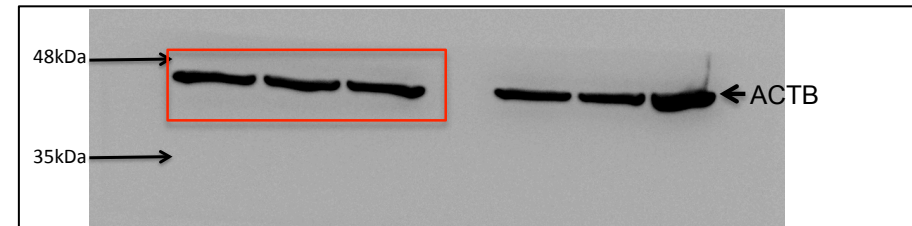

Supplementary Fig 3a

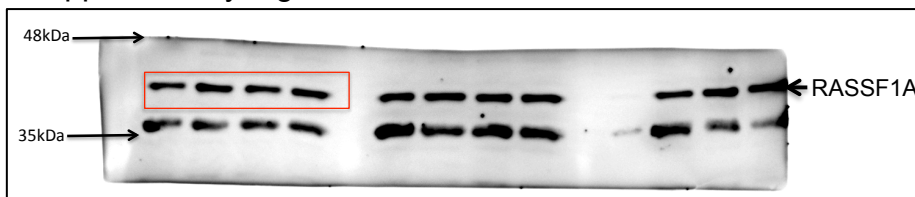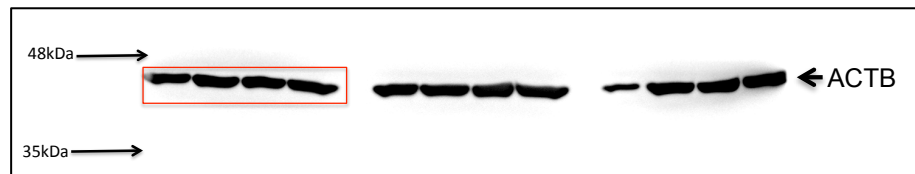

Supplementary Fig 3d

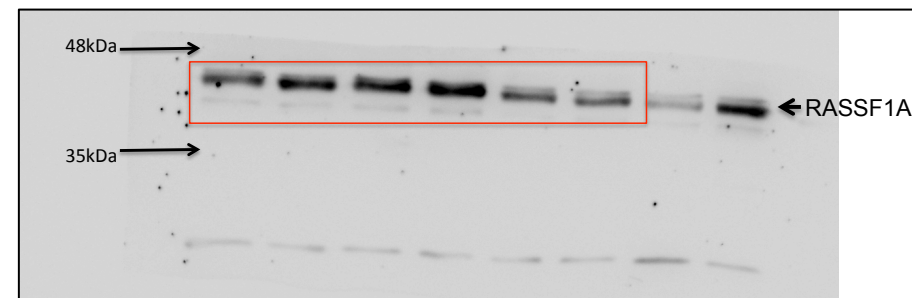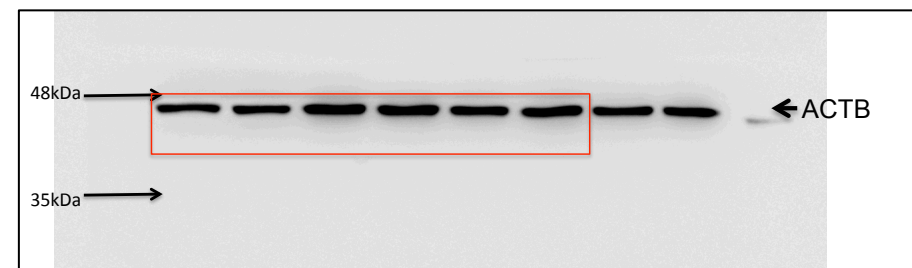



Supplementary Fig 4b

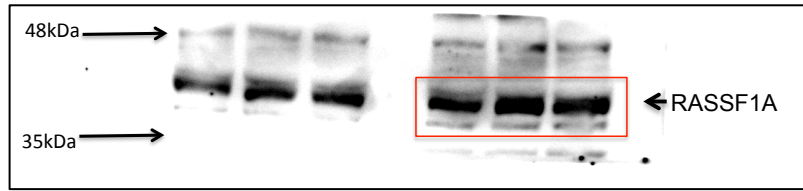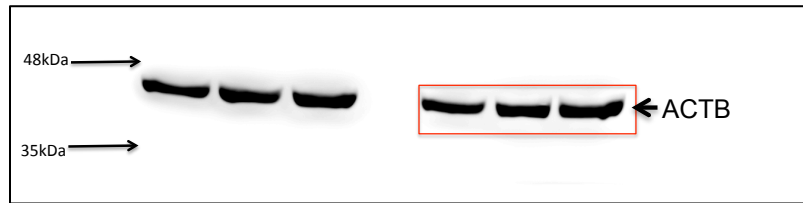

Supplementary Fig 6a

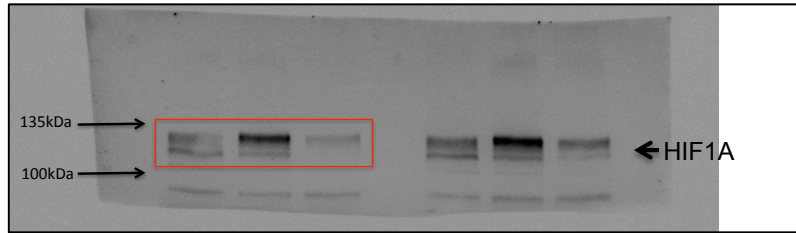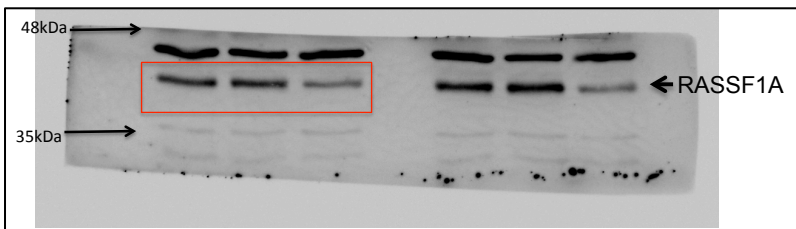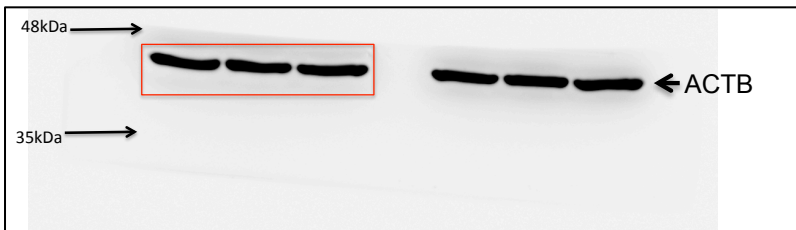

Supplementary Fig 6b

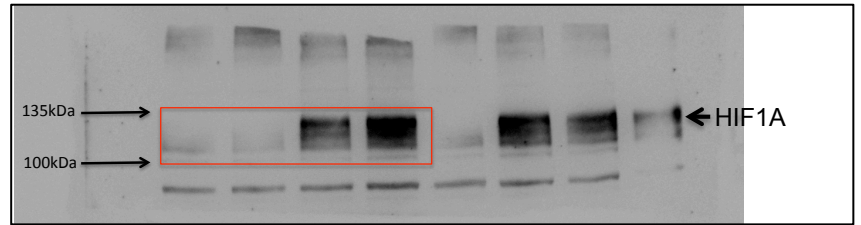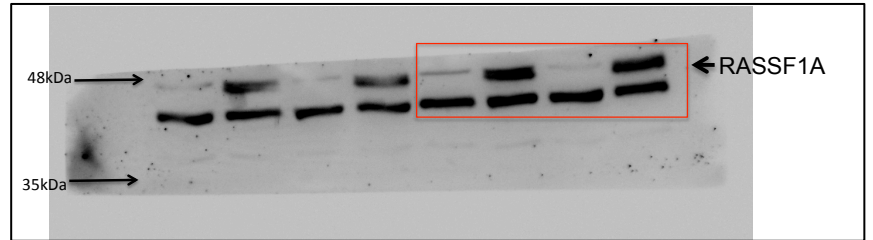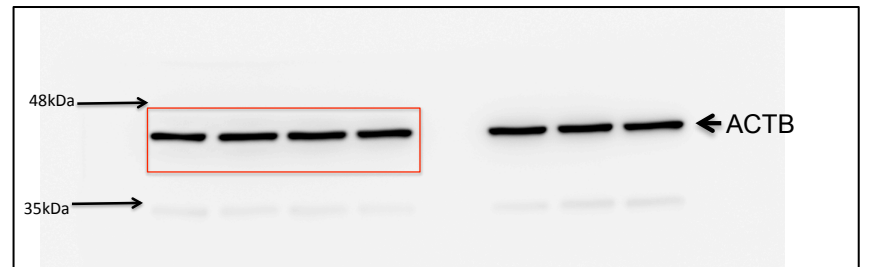

Supplementary Fig 6c

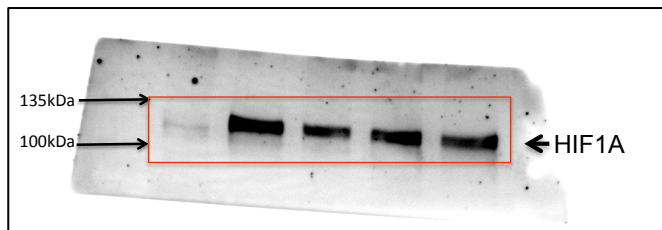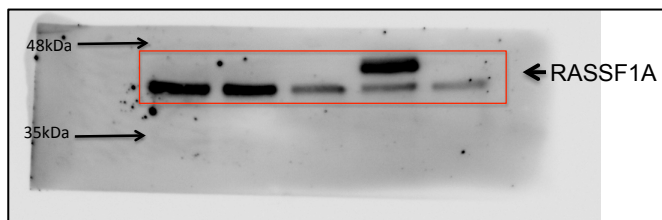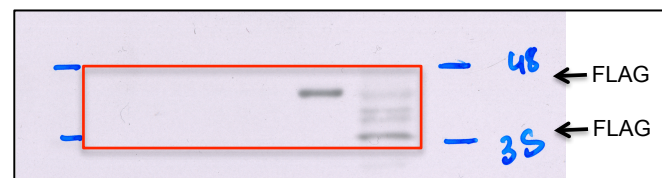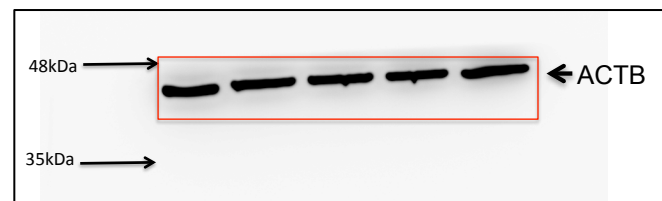

Supplementary Fig 6e

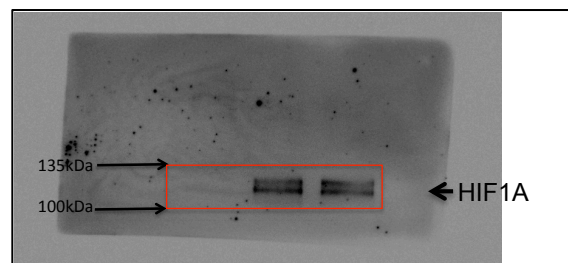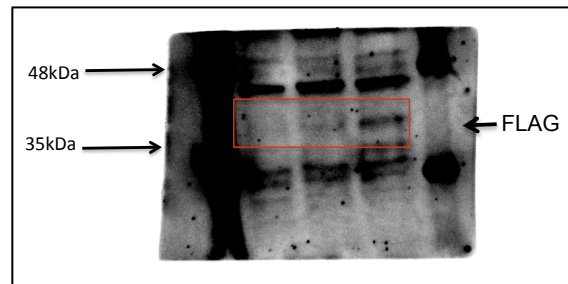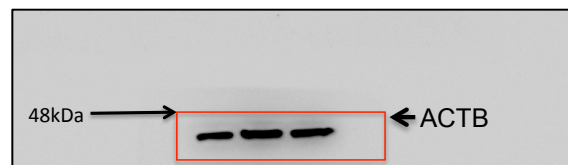

Supplementary Fig 7b

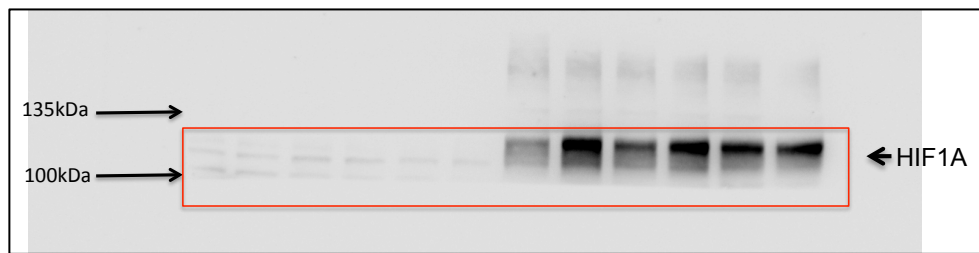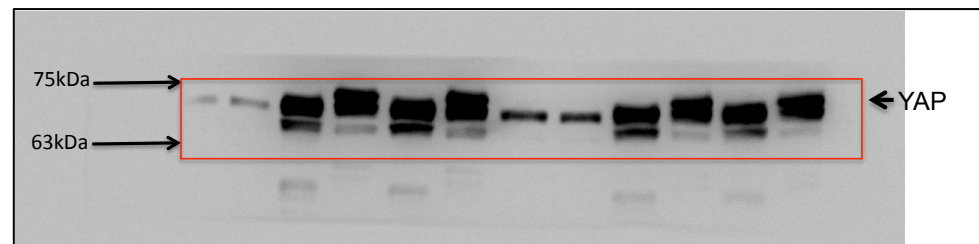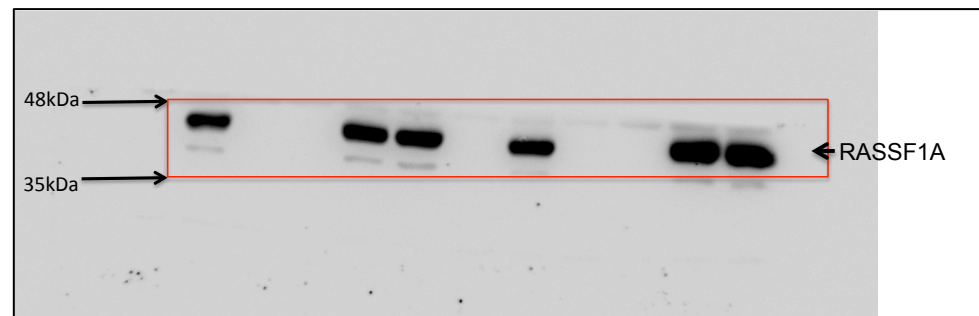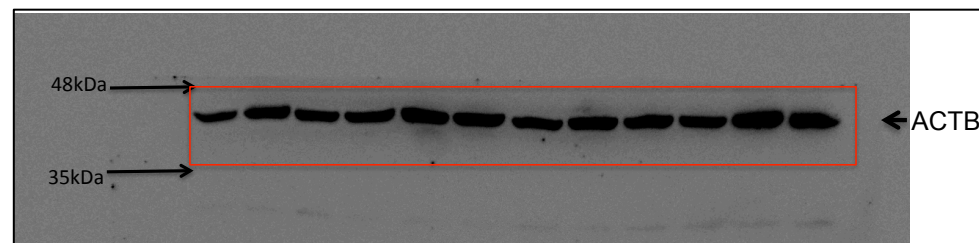

Supplementary Fig 8a

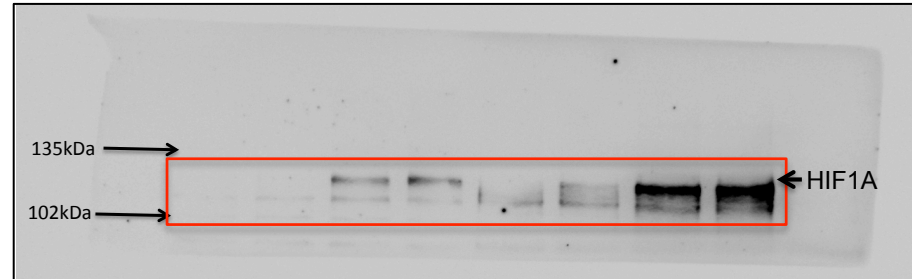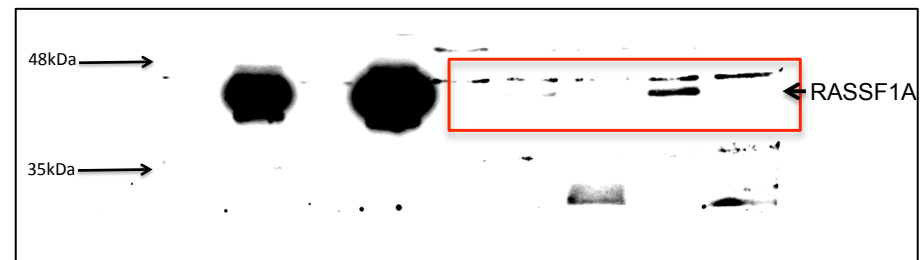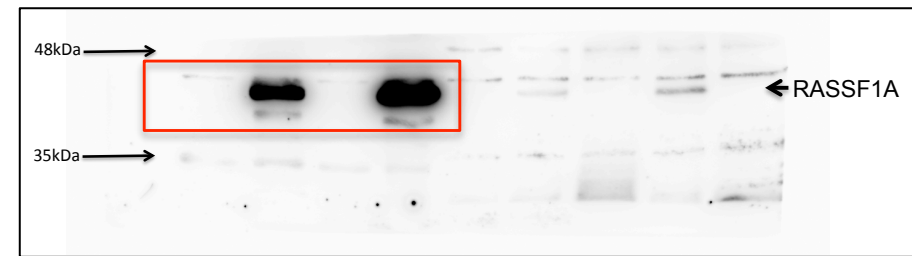

Supplementary Fig 8b

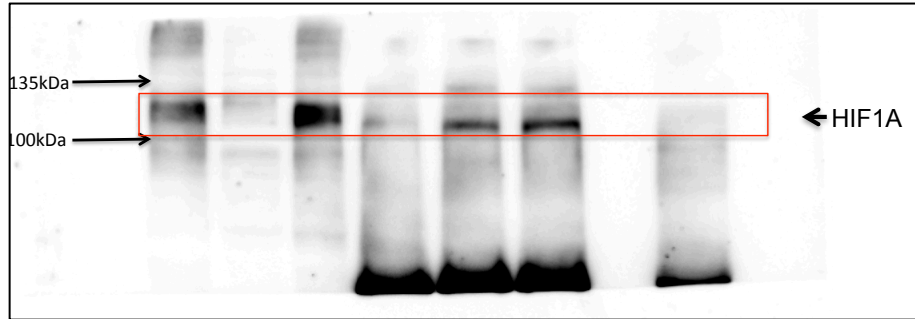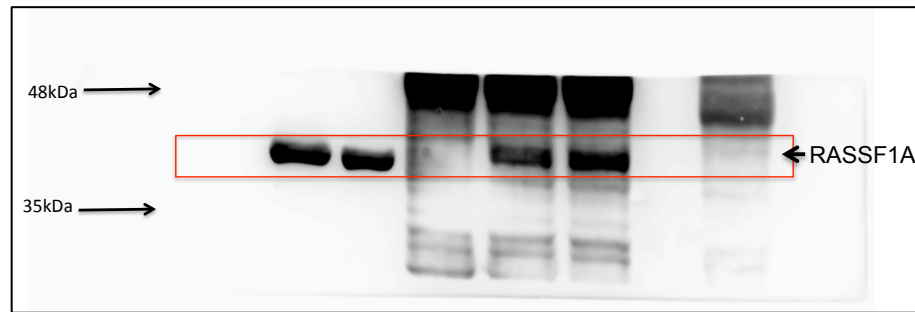

Supplementary Fig 8c

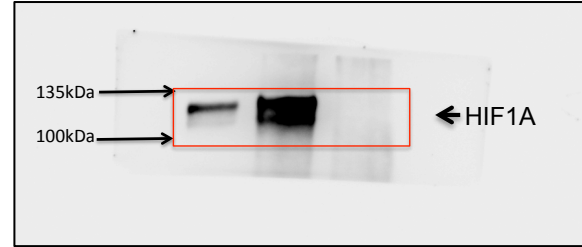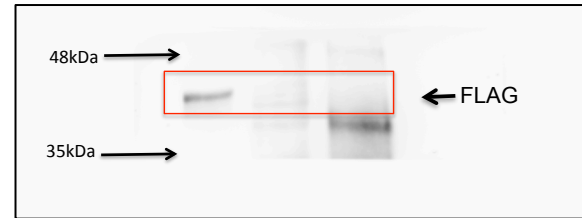

Supplementary Fig 8d

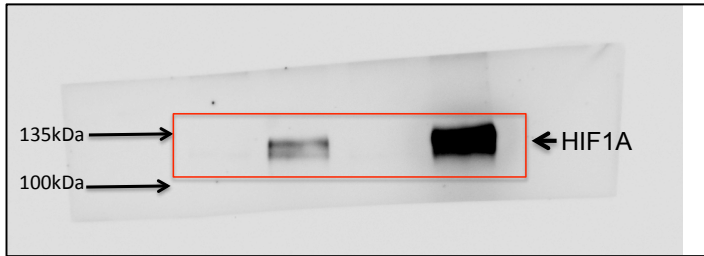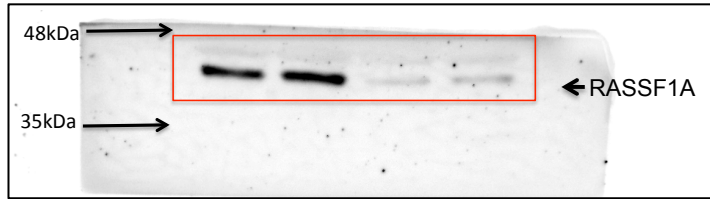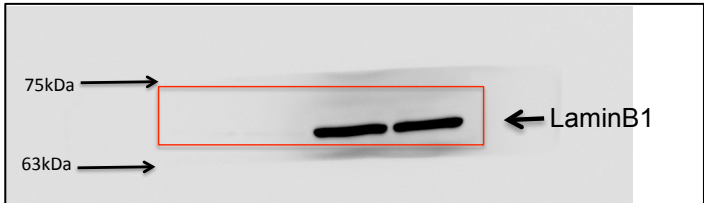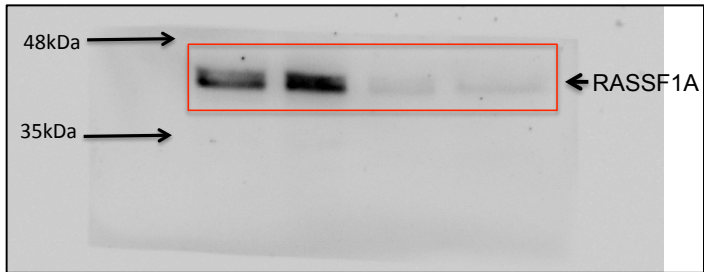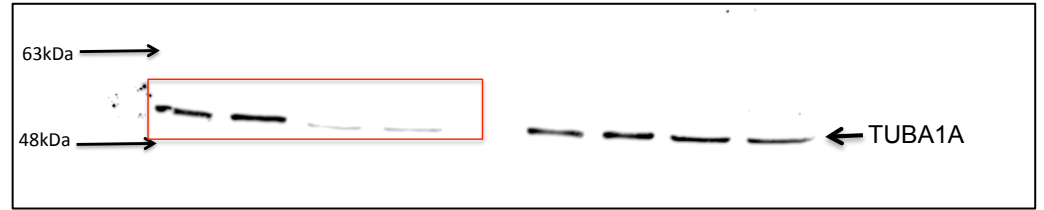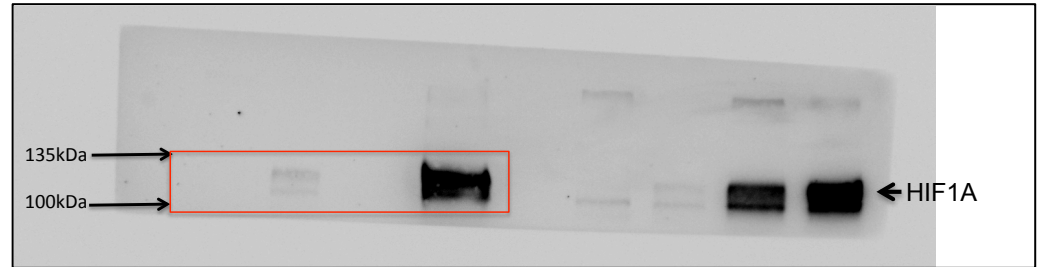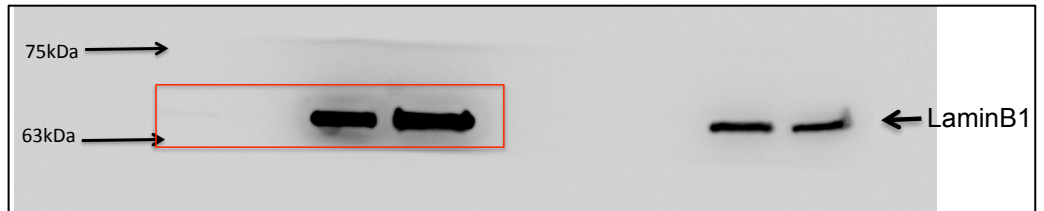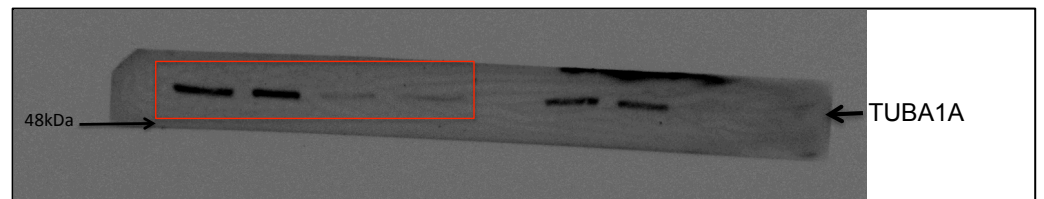



Supplementary Fig 9a

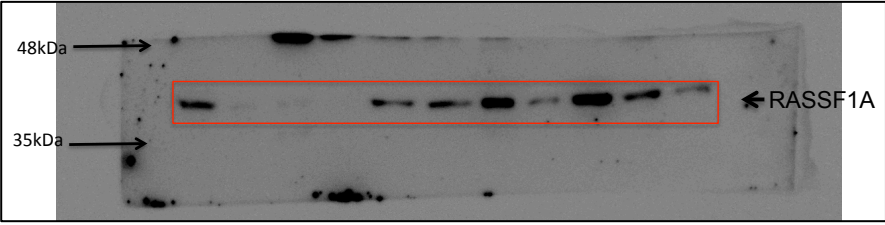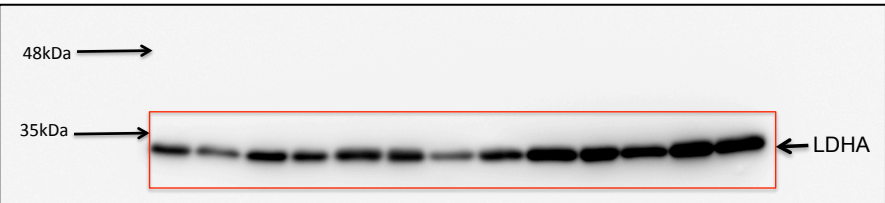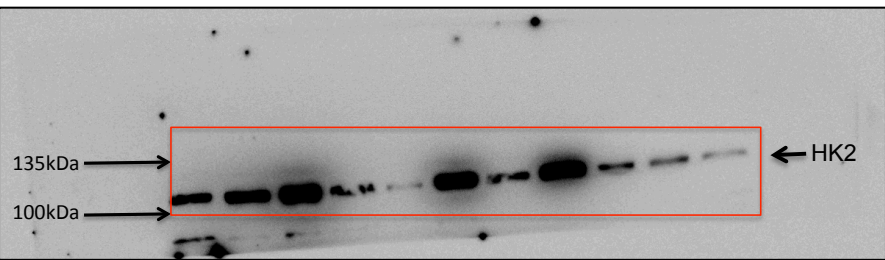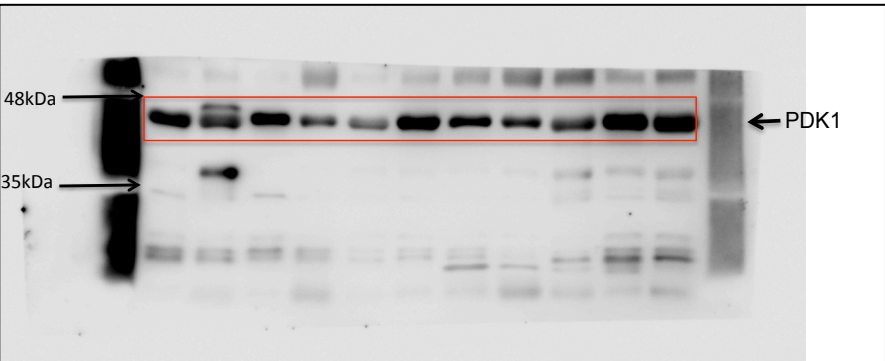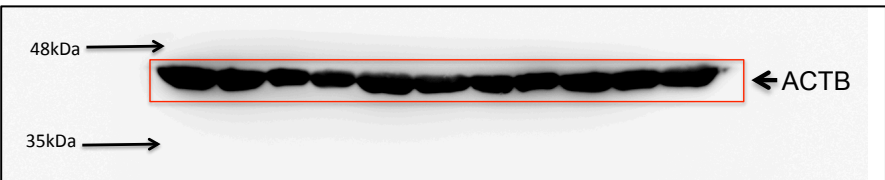

Supplementary Fig 9c

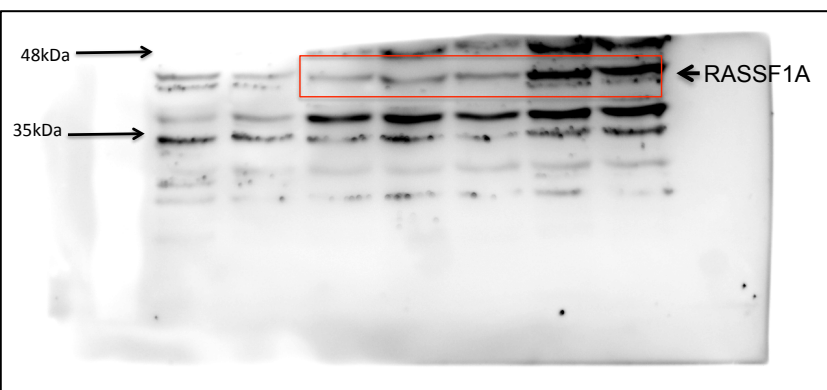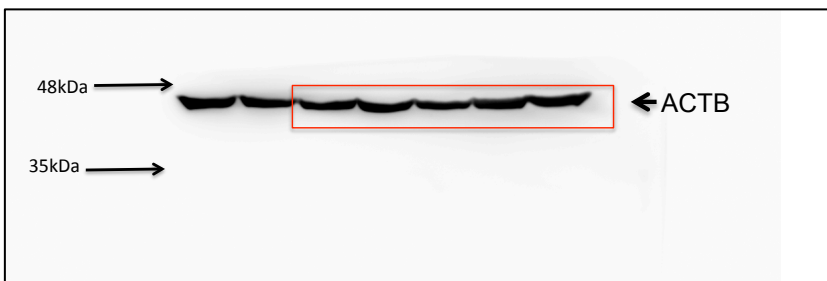

Supplementary Fig 11a

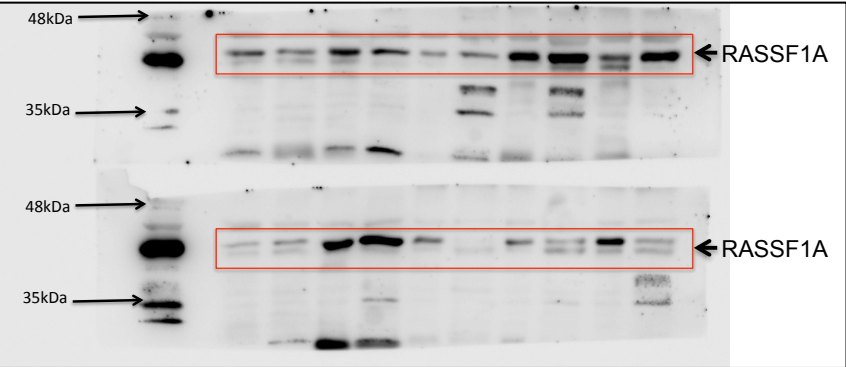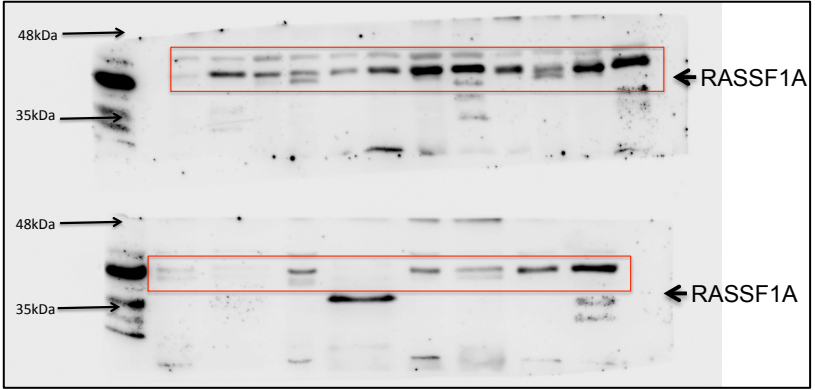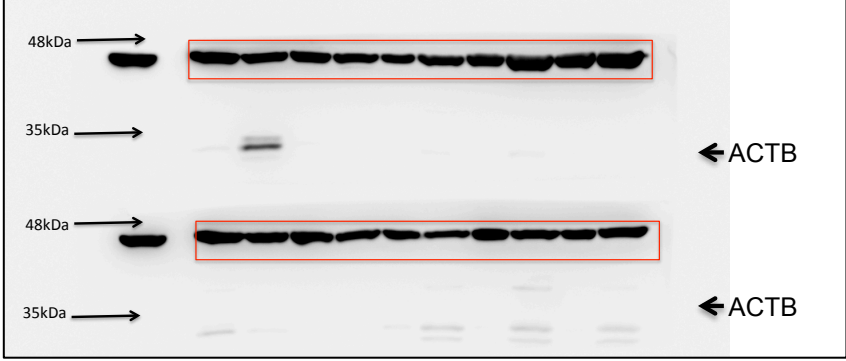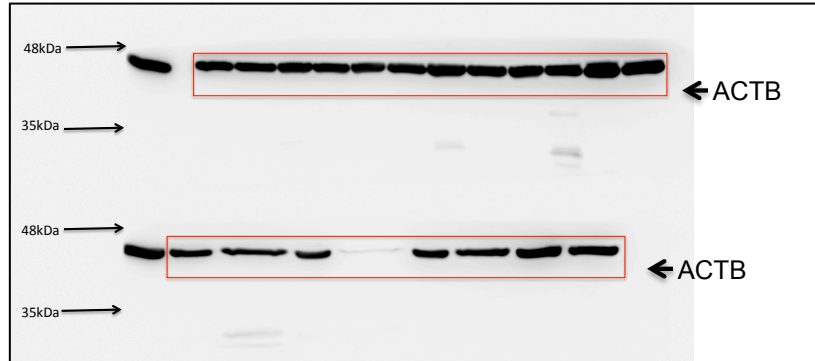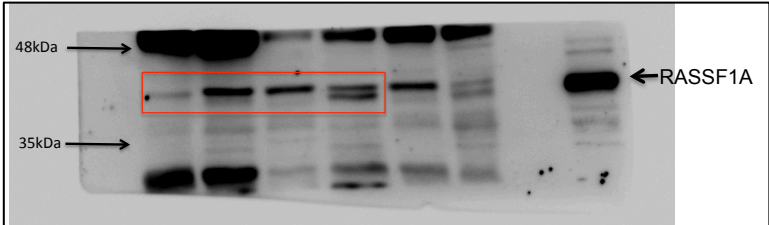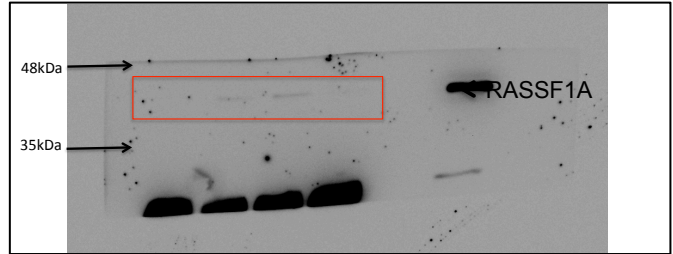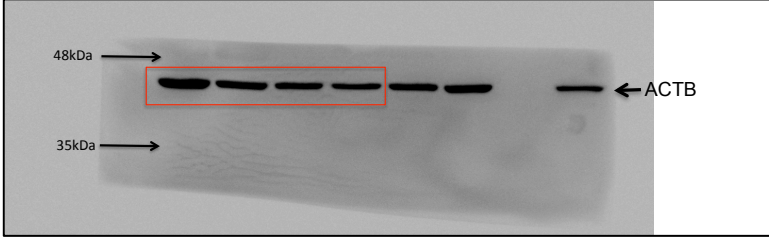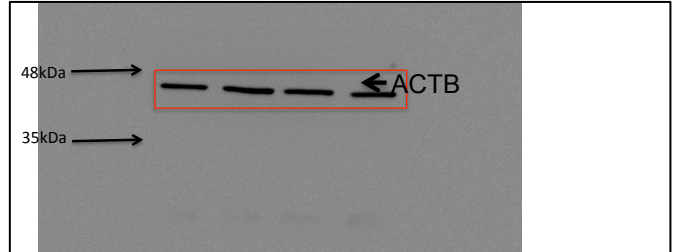



Supplementary Fig 11a

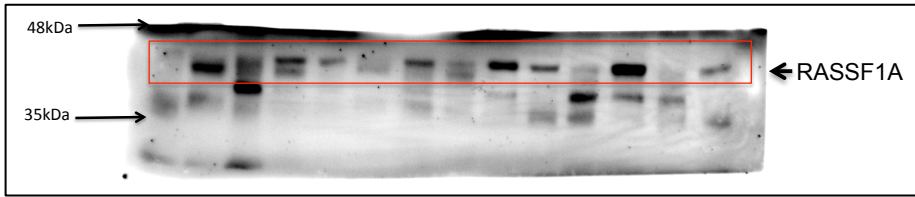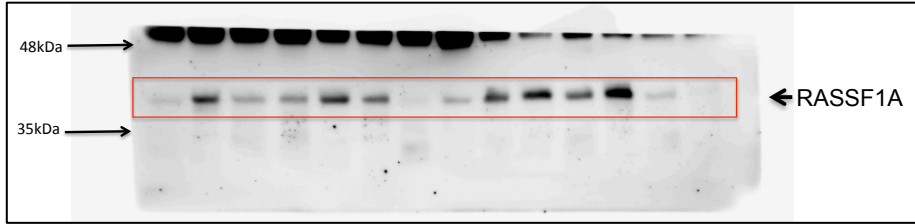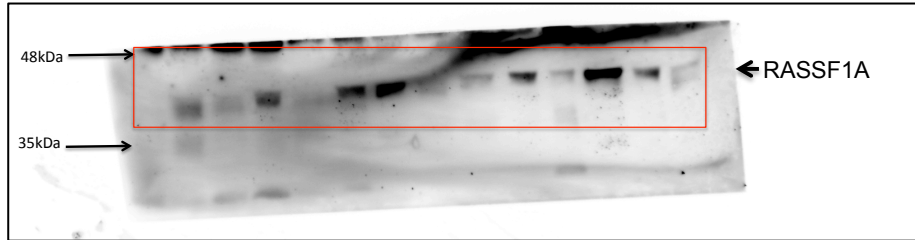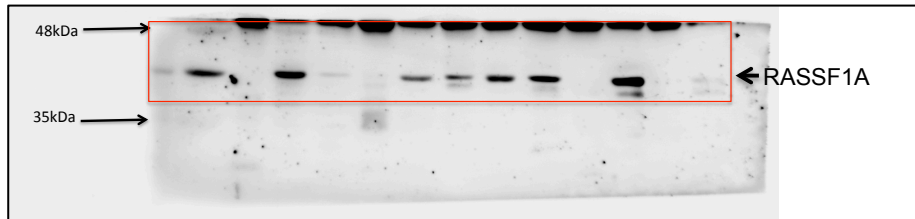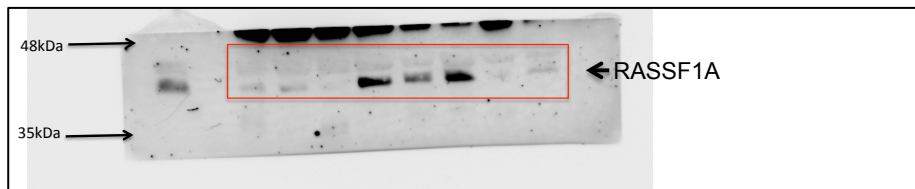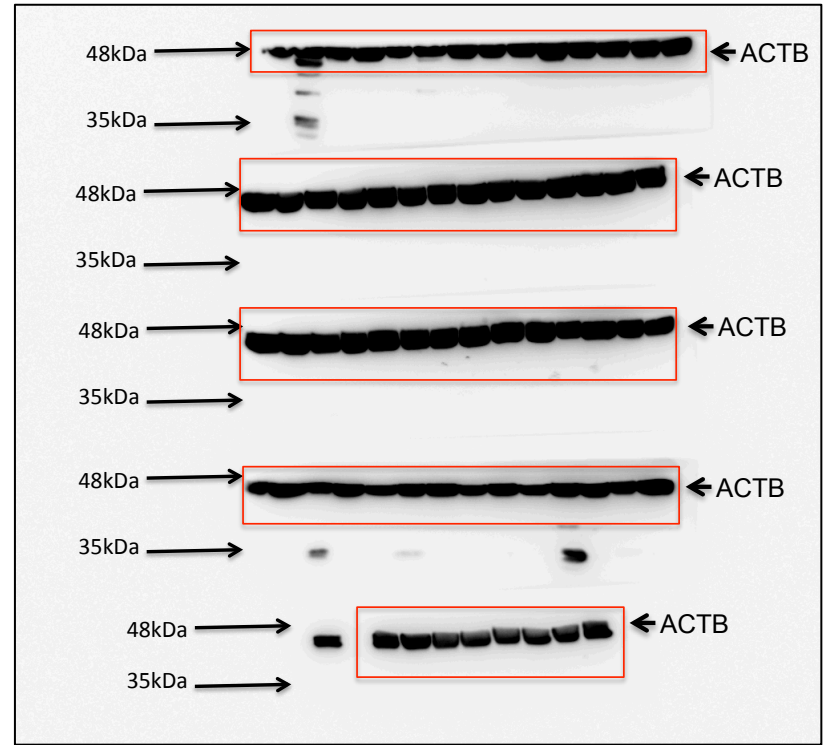

Supplement: 41467_2019_10044_MOESM4_ESM.pdf [file 41467_2019_10044_MOESM4_ESM.pdf]
